1           **Simultaneous stereo-EEG and high-density scalp EEG recordings to study the**  
2                                   **effects of intracerebral stimulation parameters**

3  
4  
5  
6   **Authors:** S. Parmigiani<sup>1§</sup>, E. P. Mikulan<sup>1§</sup>, S. Russo<sup>1,2</sup>, S. Sarasso<sup>1</sup>, F. M. Zauli<sup>1</sup>, A. Rubino<sup>3</sup>,  
7   A. Cattani<sup>4</sup>, M. Fecchio<sup>5</sup>, D. Giampiccolo<sup>6</sup>, J. Lanzone<sup>7,8</sup>, P. D’Orio<sup>3,9</sup>, M. del Vecchio<sup>9</sup>, P.  
8   Avanzini<sup>9</sup>, L.Nobili<sup>10</sup>, I. Sartori<sup>3</sup>, M. Massimini<sup>1,11,12</sup>, A. Pigorini<sup>1\*</sup>

9  
10   **Affiliations:**

11   <sup>1</sup>Department of Biomedical and Clinical Sciences “L. Sacco” Università degli Studi di Milano, Milan, Italy

12   <sup>2</sup>Department of Philosophy “Piero Martinetti”, Università degli Studi di Milano, Milan, Italy

13   <sup>3</sup>“C. Munari” Epilepsy Surgery Centre, Department of Neuroscience, Niguarda Hospital, Milan, Italy

14   <sup>4</sup>Department of Mathematics & Statistics, Boston University, Boston, MA, USA

15   <sup>5</sup>Center for Neurotechnology and Neurorecovery, Department of Neurology, Massachusetts General  
16   Hospital, Boston, MA, USA

17   <sup>6</sup>Section of Neurosurgery, Department of Neuroscience, Biomedicine and Movement Sciences, University of  
18   Verona, Verona, Italy.

19   <sup>7</sup>Department of Systems Medicine, Neuroscience, University of Rome Tor Vergata, Rome, Italy

20   <sup>8</sup>Istituti Clinici Scientifici Maugeri, IRCCS, Neurorehabilitation Department of Milano Institute, Milan, Italy.

21   <sup>9</sup>Istituto di Neuroscienze, Consiglio Nazionale delle Ricerche, Parma, Italy

22   <sup>10</sup>Child Neuropsychiatry, IRCCS Istituto G. Gaslini, Genova, Italy

23   <sup>11</sup>Istituto Di Ricovero e Cura a Carattere Scientifico, Fondazione Don Carlo Gnocchi, Milan, Italy

24   <sup>12</sup>Azrieli Program in Brain, Mind and Consciousness, Canadian Institute for Advanced Research, Toronto,  
25   Canada

26  
27   \*Corresponding Author, [andrea.pigorini@unimi.it](mailto:andrea.pigorini@unimi.it)

28   § These two authors equally contributed

29  
30   **Abstract**

31  
32   *Background:* Cortico-cortical evoked potentials (CCEPs) recorded by stereo-  
33   electroencephalography (SEEG) are a valuable clinical tool to investigate brain reactivity  
34   and effective connectivity. However, these invasive recordings are spatially sparse since  
35   they depend on clinical needs. This sparsity hampers systematic comparisons across-  
36   subjects, the detection of the whole-brain spatiotemporal properties of CCEPs, as well as  
37   their relationships with classic sensory evoked potentials.

38 *Objective:* To demonstrate that CCEPs recorded by high-density electroencephalography  
39 (hd-EEG) are sensitive to changes in stimulation parameters and compensate for the  
40 limitations typical of invasive recordings.

41 *Methods:* SEEG and hd-EEG activities were simultaneously recorded during SPES in  
42 drug-resistant epileptic patients (N=36). Changes in stimulation parameters encompassed  
43 physical (pulse intensity and width), geometrical (angle and position with respect to  
44 white/grey matter) and topological (stimulated cortical area) properties. Differences were  
45 assessed by measuring the overall responses and the amplitude of N1 and N2  
46 components of the CCEPs, and by their spectral profiles.

47 *Results:* While invasive and non-invasive CCEPs were generally correlated, differences in  
48 pulse duration, angle and stimulated cortical area were better captured by hd-EEG.  
49 Further, hd-EEG responses to SPES reproduced basic features of responses to  
50 transcranial magnetic stimulation and showed a much larger amplitude as compared to  
51 typical sensory evoked potentials.

52 *Conclusions:* The present results show that macroscale hd-EEG recordings are exquisitely  
53 sensitive to variations in SPES parameters, including local changes in physical and  
54 geometrical stimulus properties, while providing valuable information about whole-brain  
55 dynamics. Moreover, the common reference space across subjects represented by hd-  
56 EEG may facilitate the construction of a perturbational atlas of effective connectivity.

57

## 58 **Highlights**

- 59 • CCEPs recorded with hd-EEG and SEEG are correlated.
- 60 • hd-EEG recording is highly sensitive to changes in stimulation parameters.
- 61 • hd-EEG responses show higher amplitude responses with respect to non-invasive  
62 ones.
- 63 • Simultaneous recordings provide a fixed observation point across subjects.

## 64 **Key words**

65 Single pulse electrical stimulation, stereo-EEG, scalp hd-EEG, CCEP, stimulation  
66 parameters

67

## 68 **Introduction**

69 Intracortical electrical stimulation is an invaluable tool for surgical planning [1–3] and  
70 provides a direct assessment of brain evoked reactivity and effective connectivity in  
71 humans [4–6]. Clinical protocols often combine Single Pulse Electrical Stimulation (SPES)  
72 with stereotactic electroencephalography (SEEG) to evoke responses in areas explored  
73 with intracerebral electrodes [7,8]. Conceived for localizing the origin and diffusion of the  
74 epileptogenic activity [9–12] in patients with focal drug-resistant epilepsy, SPES typically  
75 elicits consistent cortico-cortical evoked potentials (CCEPs) whose features reflect  
76 physiological and pathological characteristics of the underlying neural tissue [7–9,13,14].

77 Thanks to their high functional specificity [15], signal fidelity [16], and high spatial  
78 and temporal resolution [12–14], CCEPs can be used as an electrophysiological tool to  
79 assess brain reactivity and effective connectivity complementing functional and structural  
80 connectivity measures [4,13,17,18]. However, invasive recordings are necessarily sparse  
81 since intracerebral electrodes are typically circumscribed to a limited set of brain regions  
82 differing from one subject to another depending on clinical needs [8,9,12,14,19]. The  
83 variability and sparsity of electrode placement clearly restricts a systematic comparison  
84 across subjects, the detection of the stimulation effects at the whole-brain level, as well as  
85 a direct comparison between CCEPs and other EEG potentials such as those evoked by  
86 non-invasive sensory, electrical or magnetic stimulation.

87 In the present work, we overcame these limitations by simultaneously acquiring  
88 high-density EEG recordings, which provide a fixed observation point to reliably compare  
89 the responses evoked by SPES across subjects and to assess their whole-brain dynamics,  
90 as well as their amplitude at the scalp level. Specifically, we analyzed the effects induced  
91 by the systematic manipulation of different stimulation parameters on CCEPs recorded  
92 from both SEEG and scalp EEG during wakefulness. We assessed CCEPs changes  
93 associated to physical (pulse intensity and width), geometrical (angle and position with  
94 respect to white/gray matter) and topological (stimulated cortical area) stimulation  
95 properties and found that, when compared to SEEG, high-density scalp EEG detects  
96 specific patterns that are more consistent across subjects. Notably, the differences in the  
97 overall response when stimulating different topological areas were systematically captured  
98 only by scalp recordings. We also observed a rostro-caudal gradient of the spectral  
99 properties of CCEPs evoked by the stimulation of different cortical areas, confirming  
100 previous results with Transcranial Magnetic Stimulation combined with EEG (TMS-EEG)  
101 studies [20]. Further, comparing the absolute amplitude of clinical SPES-evoked EEG

102 responses to the typical amplitude of somatosensory, visual, auditory, or TMS-evoked  
103 EEG potentials revealed that the former are the largest electrical responses that can be  
104 elicited in the awake human brain.

105

## 106 **Materials and Methods**

### 107 *Participants*

108 A total of 36 patients (median age=33±8 years, 21 female, Table S1) from the "Claudio  
109 Munari " Epilepsy Surgery Center of Milan in Italy were enrolled in the study. All subjects  
110 had a history of drug-resistant, focal epilepsy, and were candidates for surgical  
111 removal/ablation of the seizure onset zone (SOZ). 31 patients did not show any  
112 anatomical malformation in the MRI, while the other 5 patients showed small anatomical  
113 alterations (see Table S1). All patients had no neurological or neuropsychological deficits.  
114 The investigated hemisphere/s and electrodes location was decided based on  
115 electroclinical data and reported - for each subject - in Figure S1. All patients provided  
116 their Informed Consent in accordance with the local Ethical Committee (ID 348-  
117 24.06.2020, Milano AREA C Niguarda Hospital, Milan, Italy) and with the Declaration of  
118 Helsinki.

119

### 120 *Electrodes placement and localization*

121 Electrodes placement was performed as reported in [8] while electrode localization and  
122 anatomical labelling was performed as in [21]. Detailed descriptions can be found in  
123 Supplementary Materials.

124

### 125 *Simultaneous SEEG and hd-EEG Recordings*

126 During the 1-3 weeks of hospitalization, SEEG activity was continuously recorded through  
127 a 192-channel recording system (NIHON-KOHDEN NEUROFAX-1200) with a sampling  
128 rate of 1000Hz. All acquisitions were referenced to two adjacent contacts located entirely  
129 in white matter [22]. During their last day of hospitalization all subjects included in the  
130 present study underwent simultaneous scalp non-invasive recordings by means of high-  
131 density Electroencephalogram (hd-EEG - 256 channels, Geodesic Sensor Net, HydroCel  
132 CleanLeads). Placement of the hd-EEG net on the head was performed by trained  
133 neurosurgeons using sterile technique, following a precise step-by-step protocol: (1)  
134 sterilization of the net, (2) removal of the protective bandage from the subject's head, (3)  
135 skin disinfection with Betadine and Clorexan, (4) positioning of the hd-EEG net, and (5)

136 reduction of the impedances below 25-50 kOhm using conductive gel. An example of this  
137 setup is shown in Figure 1. Hd-EEG was then recorded at 1000 Hz sampling rate using an  
138 EGI NA-400 amplifier (Electrical Geodesics, Inc; Oregon, USA) referenced to Cz. SEEG  
139 and hd-EEG recordings were aligned using a digital trigger signal generated by an external  
140 trigger box (EMS s.r.l., Bologna, Italy). At the end of the simultaneous data acquisition, the  
141 spatial locations of hd-EEG contacts and anatomical fiducials were digitized with a  
142 SofTacticOptic system (EMS s.r.l., Bologna, Italy) and coregistered with a pre-implant 3D-  
143 T1MRI. The net was then removed, and the skin was disinfected again.

144

#### 145 *Single Pulse Electrical Stimulation*

146 During simultaneous hd-EEG and SEEG recordings, electrical single biphasic pulses  
147 (positive-negative) were injected between pairs of adjacent intracranial contacts pertaining  
148 to the same electrode with an inter-stimulus interval of at least one second across a wide  
149 range of intensities and pulse widths (see next paragraph). Brain activity was continuously  
150 recorded both from all other SEEG contacts as well as from the 256 scalp hd-EEG  
151 contacts. A single stimulation session consisted of 30/40 consecutive trials. The number of  
152 sessions varied between subjects ( $9 \pm 4$ ). All the sessions included in the present work  
153 (N=379) were selected following these criteria: stimulations (i) were delivered through a  
154 bipolar contact far from the SOZ (as indicated by electrical pathological activity and a  
155 *posteriori* confirmed by post-surgical assessment); (ii) were delivered through a bipolar  
156 contact that did not show spontaneous interictal epileptic activity (by visual inspection by  
157 P.dO., J.L., I.S.); (iii) did not elicit muscle twitches, somatosensory, or cognitive  
158 manifestations.

159

#### 160 *Physical, geometrical, and topological stimulation parameters*

161 This work includes a dataset collected in the context of presurgical evaluation during which  
162 SPES was delivered based on clinical assessment, thus employing different stimulation  
163 parameters. Retrospectively, we decided to group these parameters into three categories,  
164 namely *physical*, *geometrical* and *topological*.

165 *Physical stimulation parameters* included (i) stimulation intensity and (ii) pulse width.  
166 Stimulation intensities ranged from 0.1mA to 5mA. Specifically, SPES was delivered at  
167 0.1mA (N=3), 0.5mA (N=13), 1mA (N=23), 3mA (N= 63) and 5mA (N= 223). Given the low  
168 number of sessions performed with intensities  $\leq 1$ mA we decided to group together all  
169 these intensities (N=39). Pulse widths were instead 0.5ms (n=184) or 1ms (n=139).

170 *Geometrical stimulation parameters* refer (i) to the position of the stimulating bipolar  
171 contact with respect to the interface between grey matter and white matter and (ii) to the  
172 angle of insertion of the SEEG electrode with respect to the cortical surface. To derive  
173 both parameters we used the 3D meshes of the grey and white matter obtained with  
174 Freesurfer [25]. The distance to the grey/white matter boundary was computed as the  
175 distance between the center of the stimulating bipolar contact and the closest point on the  
176 white matter mesh (see Figure 1D and Figure 3A) using the *trimesh* library. The distances  
177 of the bipolar contacts were then lumped into three categories: both contacts in grey  
178 matter (*GG*), both contacts in white matter (*WW*) and one contact in grey matter and one  
179 in white matter (*GW*). The angle with respect to the cortical surface was calculated using  
180 the vector formed by the SEEG bipolar contact, and the normal vector of the closest  
181 segment of the white matter mesh (see Figure 1D and Figure 3C). Also the angles were  
182 lumped into two categories with respect to the cortical surface: *parallel* ( $\delta < 45^\circ$ ;  $\delta > 315^\circ$ ;  
183 and  $135^\circ < \delta < 225^\circ$ ) and *perpendicular* ( $45^\circ < \delta < 135^\circ$  and  $225^\circ < \delta < 315^\circ$ ).

184 *Topological stimulation parameters* included the following stimulated cortical areas:  
185 Cingulate cortex (n=30), Frontal cortex (n=93), Insula (n=26), Occipital cortex (n=37),  
186 Parietal cortex (n=113), Temporal cortex (n=80) using the Desikan-Killiany atlas for the  
187 anatomical labelling.

188

### 189 *Data pre-processing*

190 The joint visual inspection of both SEEG and hd-EEG CCEPs allowed to retain 323/379  
191 sessions (~85%), excluding 9 sessions that showed evoked epileptic spikes either at the  
192 scalp or intracerebral EEG level (Figure S1, see also [12]), and 47 sessions characterized  
193 by a number of retained trials lower than 25 due to overall bad data quality or the presence  
194 of interictal activity.

195 For the retained SPES sessions SEEG data were processed as in [24] while hd-  
196 EEG data were preprocessed as in [25]. Detailed procedures are reported in  
197 Supplementary Material.

198

### 199 *Amplitude Analysis*

200 The effects of SPES parameters were assessed both at the SEEG and the hd-EEG level  
201 by measuring standard features of CCEP waveforms (amplitude of N1 and N2) as well as  
202 surrogate measures of the overall response (Figure 2). Specifically, at the SEEG level, the  
203 latter was quantified as the number of contacts responding with a significant CCEP (above

204 6 STD of the baseline, Figure 2B) to SPES [26], while the amplitudes of N1 and N2 were  
205 obtained at the single contact level [27,38] and then averaged across contacts.  
206 Conversely, at the hd-EEG level, the overall response was obtained as the Global Mean  
207 Field Power (GMFP, between 0ms and 500ms, shaded blue area in Figure 2B) and the  
208 amplitude of N1 and N2 were detected as the maximum peak of the GMFP (black circles  
209 in Figure 2B), respectively in the 0-50ms (dash and dot vertical line in Figure 2) and 50ms-  
210 300ms time window. SNR was calculated in the same time windows.

211

### 212 *Spectral Analysis*

213 We performed an analysis similar to [20], in which we compared the spectral properties of  
214 the CCEPs elicited by the stimulation of the occipital, parietal and frontal cortices.  
215 Specifically, for each session, we conducted a time-frequency spectral analysis (Event  
216 Related Spectral Perturbations, ERSP [29]) that was averaged across contacts within each  
217 session. The resulting time-frequency power distribution was cumulated over time between  
218 10ms and 150ms. Finally, due to the prominent presence of a non-specific response (*i.e.*,  
219 the N1 - N2 complex), we characterized the spectral profile as the mean frequency -  
220 instead of the maximum peak [20].

221

### 222 *Statistical Analyses*

223 Correlations between SEEG and hd-EEG measures were performed with non-parametric  
224 Spearman's correlation analyses. Differences among multiple groups were assessed with  
225 Kruskal-Wallis test (KW), followed by a post-hoc Wilcoxon Rank Sum test (WR, corrected  
226 for multiple comparisons using the False Discovery Rate method-FDR). Statistical  
227 interactions among stimulation parameters were performed with ANalysis Of VAriance  
228 (ANOVA). All descriptive values are reported along the manuscript as the mean  $\pm$  standard  
229 deviation. All statistical analyses were performed in R.

## 230 **Results and Discussion**

231 To the best of our knowledge, this is the first time that responses to intracortical SPES  
232 were studied simultaneously with SEEG and scalp hd-EEG, as previous concurrent  
233 recordings were only carried out for spontaneous activity while using low-density standard  
234 10-20 systems [30–33].

235 Here, simultaneous scalp hd-EEG and intracranial SEEG recordings of CCEPs  
236 were performed in 36 awake drug-resistant epileptic patients undergoing SPES for  
237 presurgical evaluation (see Figure 1A-B-C). Overall, our dataset included 323 artefact-free  
238 recording sessions encompassing different stimulation parameters, which were clustered  
239 in three categories (see Figure 1D): *physical* (stimulation intensity and pulse width),  
240 *geometrical* (position of the bipolar contact with respect to grey/white matter and angle of  
241 the electrode with respect to the cortical surface), and *topological* (stimulated cortical  
242 area).

243

### 244 *General features of CCEPs were consistent between SEEG and hd-EEG*

245 CCEPs were highly reproducible from trial to trial (Figure 1C) and characterized by a high  
246 signal-to-noise ratio both in intracerebral ( $\text{SNR} = 7.45 \pm 10.73$ ) and in hd-EEG ( $\text{SNR} =$   
247  $6.96 \pm 4.94$ ) recordings (Figure 1D). We first quantified the overall strength of the response  
248 to SPES by computing GMFP (cumulated between 0ms and 500ms) at the hd-EEG level,  
249 and the percentage of significantly responding contacts at the SEEG level (Figure 2B).  
250 Then, we evaluated the waveshape of CCEPs by measuring the average amplitude of N1  
251 and N2 across all sessions (Figure 2B and Methods). Despite displaying different  
252 waveshapes at the single contact level (see for example Figure 1E), hd-EEG and SEEG  
253 showed on average a similar waveform characterized by a prominence of the typical  
254 [27,34–36] N1 and N2 components ( $\text{N1} = 9.5 \pm 5.04\mu\text{V}$ ;  $\text{N2} = 11.36 \pm 9.86\mu\text{V}$  for hd-EEG  
255 and  $\text{N1} = 13.90 \pm 7.04$  z-value;  $\text{N2} = 15.20 \pm 7.02$  z-value for SEEG; Figure 2A).  
256 Importantly, we found significant positive correlations (GMFP and number of responding  
257 contacts,  $r=0.592$ ; N1 amplitude,  $r=0.313$ ; N2 amplitude,  $r=0.553$ . All  $p < 0.001$ ) between  
258 the above-mentioned SEEG and hd-EEG measures (Figure 2C), suggesting that general  
259 features of CCEPs could be captured at both levels.

260

### 261 *Physical stimulation parameters: the effects of pulse intensity and width*

262 The effects of varying stimulation intensity could be appreciated in the CCEPs when  
263 measuring N1, N2 and overall strength of the response both at the SEEG and hd-EEG



264 level (Figure 3A). Statistical analysis performed with KW and post-hoc pairwise  
265 comparisons using WR tests revealed that the differences among the three stimulation  
266 intensities ( $\leq 1\text{mA}$ ,  $3\text{mA}$  and  $5\text{mA}$ ) could be fully captured by both SEEG and hd-EEG  
267 (Figure 3B). Specifically, SEEG showed a significant difference in the percentage of  
268 contacts responding to SPES ( $H_{(2)}=25.70$ ,  $p<0.001$ ), in the N1 amplitude ( $H_{(2)}=25.39$ ,  
269  $p<0.001$ ) and in N2 amplitude ( $H_{(2)}=36.60$ ,  $p<0.001$ ). Similarly, hd-EEG showed significant  
270 differences in the GMFP ( $H_{(2)}=10.05$ ,  $p=0.006$ ), in N1 amplitude ( $H_{(2)}=12.13$ ,  $p=0.002$ ), as  
271 well as in N2 ( $H_{(2)}=11.95$ ,  $p=0.002$ ). Post-hoc statistical analyses are reported in Table S2.

272 Conversely, differences in pulse width (0.5ms vs 1ms) were captured only by hd-  
273 EEG but not by SEEG (Figure 3C). Specifically, at the hd-EEG level, WR test showed that  
274 GMFP, amplitude of N1 and amplitude of N2 were significantly larger for 1ms than for  
275 0.5ms pulse width ( $W=14193$ ,  $W=13916$ ,  $W=12663$ , respectively, all  $p<0.001$ ; Figure 3D).  
276 Of note, both physical stimulation parameters (intensity and width) were not biased by any  
277 specific spatial distribution (see Figure S3A-B).

278 Overall, these results are in line with previous intracerebral studies which  
279 demonstrated that the amplitude of N1 and N2 components and, more in general, the  
280 amplitude of CCEPs depend on the amount of injected current [37–40]. However, while the  
281 effect of stimulation intensity has been clearly described, the effects of pulse width are less  
282 consistent across the literature [14,28,39,41]. Here, the larger hd-EEG responses elicited  
283 by longer pulse width stimulations may suggest the involvement of a larger network,  
284 implying broader polysynaptic activations [27] and recurrent activities [24,42]. In summary,  
285 complementing intracerebral explorations with whole brain hd-EEG measures confirms  
286 previous findings regarding stimulation intensity and suggests that the effects of pulse  
287 width may not be fully captured by SEEG recording alone.

288

289 *Geometrical stimulation parameters: the effects of contact position with respect to the*  
290 *cortex*

291 First, we assessed the SEEG and hd-EEG responses to SPES when stimulating at  
292 different distances from grey-white matter interface (operationalized as GG/GW/WW;  
293 Figure 4A). We observed that this geometrical stimulation parameter affected CCEPs both  
294 at the SEEG and hd-EEG level, as assessed by KW statistical analyses. Specifically, this  
295 was true for all measures at the hd-EEG level (for GMFP,  $H_{(2)}=15.03$ ,  $p<0.001$ ; for AMP N1,  
296  $H_{(2)}=26.41$ ,  $p<0.001$ ; for AMP N2  $H_{(2)}=11.95$ ,  $p<0.01$ ). Instead, at the SEEG level only the  
297 percentage of responding contacts and the amplitude of N2 showed a significant

298 difference ( $H_{(2)}=12.66$ ,  $p<0.01$ ;  $H_{(2)}=17.47$ ,  $p<0.001$ ; respectively), while the N1 amplitude  
299 was not significantly affected ( $H_{(2)}=5.12$ ,  $p=0.077$ ). In particular, except for N1 in SEEG,  
300 post-hoc comparisons showed that the stimulation of WW was more effective (*i.e.*, larger  
301 CCEP response) with respect to the stimulation of GW, which in turn was more effective  
302 than the stimulation of GG (Figure 4B and Table S3).

303 The second geometrical parameter we considered was the angle with respect to the  
304 grey-white matter interface (operationalized as parallel/perpendicular, Figure 4C). In this  
305 case (Figure 3C), perpendicular stimulations led to significantly larger responses only at  
306 the hd-EEG level (for GMFP,  $W=6361$   $p=0.045$ ; for AMP N1  $W=6483$   $p=0.038$ ; for AMP N2  
307  $W=6551$   $p=0.044$ ). On the contrary, none of the SEEG measures showed significant  
308 differences ( $W=6588$   $p=0.125$ ,  $W=5491$   $p=0.473$ , and  $W=5491$   $p=0.286$  for percentage of  
309 responding contacts, AMP N1, and AMP N2, respectively). Of note, both geometrical  
310 parameters (white matter distance and angle) were not biased by any specific spatial  
311 distribution (Figure S3C-D).

312 Studies on intracerebral techniques that focused on the effect of geometrical  
313 stimulation parameters have been performed to optimize Deep Brain Stimulation protocols.  
314 According to these studies, small differences in electrode location [43–46], as well as  
315 orientation [47] can generate considerable differences in the activated white matter  
316 pathways. In line with these findings, the larger hd-EEG responses observed both with  
317 WW and perpendicular stimulations could be ascribed to the more extensive involvement  
318 of white-matter fiber bundles.

319

### 320 *Interactions between physical and geometrical stimulation parameters*

321 The above-mentioned stimulation parameters could in principle interact at different levels.  
322 However, a model with the interaction of all the explored physical and geometrical  
323 parameters would require a larger sample. For this reason, we tested the interactions  
324 using pairwise bivariate ANOVAs. Overall, we observed significant interactions only at the  
325 hd-EEG level in pulse width/angle, pulse width/distance from white matter,  
326 intensity/distance from white matter (Figure S4). Specifically, the first two were found both  
327 for GMFP and amplitude of N2 while the latter was found only for N1 amplitude. Although it  
328 is conceivable that longer pulse widths and higher intensities might have stronger effects  
329 when delivered closer or perpendicular to white matter fiber bundles [48-51] and that this  
330 might reflect in more effective whole-brain level effects (*i.e.*, recorded with hd-EEG), future

331 studies including a larger sample size and a multivariate analysis would be needed to  
332 reach an exhaustive interpretation of these interactions.

333

#### 334 *Topological stimulation parameters: the effect of stimulating different areas*

335 Further, we evaluated whether the stimulation of different cortical areas was associated  
336 with differences in CCEP amplitude. At the hd-EEG level, we systematically observed that  
337 responses to the stimulation of the frontal cortex were larger than those obtained when  
338 stimulating any other cortical area. Specifically, as shown in Figure 5C, KW test and  
339 Wilcoxon Rank Sum post-hoc pairwise comparisons revealed a significant difference for all  
340 the measures at the hd-EEG level (GMFP:  $H_{(5)}=15.45$ ,  $p=0.008$ ; AMP1  $H_{(5)}=20.32$ ,  $p=0.001$ ;  
341 AMP2  $H_{(5)}=19.85$ ,  $p=0.001$ ). On the contrary, among all the considered S EEG measures,  
342 only N1 showed a significant effect (percentage of responding contacts:  $H_{(5)}=10.41$ ,  $p=0.06$ ;  
343 AMP1  $H_{(5)}=20.71$ ,  $p=0.0009$ ; AMP2  $H_{(5)}=9.29$ ,  $p=0.09$ ). Post-hoc statistical analyses are  
344 reported in Table S4.

345 High-amplitude responses to SPES of the frontal cortex could be due to the  
346 involvement of the circuits related to saliency [52,53], which are thought to be responsible  
347 for the generation of high amplitude scalp EEG graphoelements such as the K-complex  
348 [54] and the Vertex Wave [55]. Intriguingly, the latter is the largest graphoelement that can  
349 be evoked by sensory stimulation in an awake brain and is on average 25 $\mu$ V, with a peak-  
350 to-peak maximal amplitude of 35 $\mu$ V [52–55].

351

#### 352 *Comparing invasive and non-invasive brain stimulation techniques*

353 In our dataset, CCEPs voltage at Cz were on average 43.42 $\mu$ V (average reference;  
354 53.1 $\mu$ V when referenced to mastoid), reaching a peak-to-peak maximum of 172.16 $\mu$ V  
355 (average reference; 214.43 $\mu$ V when referenced to mastoid), and thus much larger than  
356 any sensory evoked potential recorded during wakefulness. This finding is particularly  
357 interesting when considering CCEPs impact on the subjects' awareness: despite eliciting  
358 massive and long-lasting activations of cortical circuits, none of our intracranial stimulation  
359 resulted in any reportable perceptual event.

360 Interestingly, CCEPs' voltages at the scalp EEG level were also out of scale with respect  
361 to the scalp EEG responses typically obtained when perturbing similar circuits with non-  
362 invasive peripheral or direct stimulation in awake healthy subjects. Indeed, sensory (be it  
363 auditory, somatosensory or visual) evoked potentials may range from a fraction of a  
364 microvolt to few microvolts, while TMS evoked potentials (TEPs) may reach amplitudes of

365 about 20 $\mu$ V [56–59]. Importantly, our results showed that, similarly to TMS, SPES could  
366 elicit large EEG components that persist for hundreds of milliseconds, thus corroborating  
367 the idea that late components genuinely reflect the effects of direct cortical rather than  
368 peripheral activation [60].

369 Furthermore, combining hd-EEG with SPES allowed to directly compare invasive  
370 and non-invasive (TMS) stimulation methods in terms of spectral properties emerging at  
371 the local and at whole brain level when perturbing the brain at different sites - as in TMS-  
372 EEG investigations [20]. To this aim, we calculated time-frequency spectra (ERSP) of the  
373 CCEPs collected with SEEG and hd-EEG when stimulating occipital, parietal or frontal  
374 cortices (Figure 6A-B). Then, we cumulated the ERSPs over time (between 5ms and  
375 150ms) to obtain a spectral profile for each session, whose grand average is depicted in  
376 Figure 6C-D. This analysis showed that the CCEPs evoked by the stimulation of the  
377 occipital, parietal and frontal cortices were characterized by a rostro-caudal gradient of  
378 mean frequencies - *i.e.*, occipital<parietal<frontal (Figure 6C-D). These differences were  
379 significant both at the hd-EEG and at the SEEG level as assessed by KW tests (hd-EEG:  
380  $H_{(2)}=16.49$ ,  $p=0.0002$ ; SEEG:  $H_{(2)}=8.31$ ,  $p=0.013$ ) and post-hoc one-tailed WR tests (Table  
381 S5). These results obtained with intracortical SPES confirm previous non-invasive TMS-  
382 EEG assessments [20,56] and reflect site specific spectral properties that are amplitude-  
383 independent and can be observed both at the whole brain level (*i.e.*, with the scalp EEG)  
384 as well as locally (SEEG).

385

### 386 *Limitations*

387 Our results were obtained from a population of epileptic patients whose clinical condition  
388 and specific treatment [61] may affect both invasive and non-invasive recordings. To  
389 minimize this confound, we did not include any SEEG contact located in the SOZ (as  
390 verified by surgical resection) or exhibiting sustained pathological interictal activity.  
391 Moreover, we excluded from the analyses all the CCEPs showing evoked epileptic activity  
392 at the SEEG and/or at the hd-EEG level [9].

393 Clinical needs also constrained the exploration of physical stimulation parameters to  
394 few pulse intensities and two pulse widths. Future studies encompassing multiple intensity  
395 and pulse width steps, like Paulk and colleagues [63], will allow for a more systematic  
396 comparison between invasive and non-invasive stimulation techniques.

397 Finally, the combination of SEEG and hd-EEG entails specific data acquisition  
398 protocols to prevent infective risks. This implies a short duration of SPES procedures and

399 thus the acquisition of few trials from a limited number of sites per patient. To compensate  
400 for these constraints, we verified that the number of acquired trials led to reliable  
401 responses in terms of SNR - both at the SEEG and hd-EEG level - and we included a  
402 relatively large number of stimulation sessions (N=323) and subjects (N=36). This sample  
403 size allowed to perform univariate analyses and to assess interactions through bivariate  
404 models (Figure S4). Larger datasets will ensure the possibility of performing multivariate  
405 analyses considering all the explored variables. In this respect, the results shown in the  
406 present manuscript represent a first step toward a more comprehensive description of the  
407 scalp EEG responses to SPES and their relationship with intracerebral recordings.

408

### 409 *Conclusions*

410 The present results show that CCEPs recorded with hd-EEG are overall aligned with those  
411 obtained with invasive SEEG recordings. Most important, they show that macroscale hd-  
412 EEG recordings are exquisitely sensitive to variations in stimulation parameters, including  
413 local changes in physical and geometrical stimulus properties, while overcoming the  
414 limitations typical of sparse recordings.

415 In general, the possibility of studying and comparing across subjects the effects of multiple  
416 local intracortical perturbations at the whole brain level opens interesting fields of  
417 investigations. For example, it may complement current datasets on the structural [64] and  
418 functional [65] connectomes with an effective connectome [28] whereby intracortical  
419 interactions are systematically studied by a causal perspective in the common recording  
420 space of scalp EEG and with a full assessment of spatio-temporal dynamics. Moreover,  
421 hd-EEG recordings allow direct comparisons between the CCEPs and classic evoked  
422 potentials elicited by non-invasive stimulation. For example, EEG responses to SPES  
423 reproduced the rostro-caudal spectral gradient as previously shown by TMS-EEG  
424 measurements and were found to be systematically larger than any sensory evoked  
425 potential that can be elicited during wakefulness, including those associated with stimulus  
426 perception. Along these lines, future studies should also explore, in terms of their whole-  
427 brain spatio-temporal features, why some brain responses are associated with perceptual  
428 events and others do not.

429 **Authors contributions**

430 Conceptualization: S.P., E.M., S.R. and A.P.; supervision: A.P. and M.M.; data collection:  
431 S.P., S.R. A.P., F.Z., A.R., and I.S. data curation: E.M. and AP; data analyses: S.P., E.M.,  
432 A.P., S.R., M.F., A.C.; clinical investigation: I.S., J.L., D.G., P.dO, statistical analysis: E.M.,  
433 S.P., S.R. and A.P.; writing original draft: S.P., A.P., E.M., S.R, and S.S.; review and  
434 editing: all authors.

435

436 **Declarations of interest**

437 None of the authors have conflicts of interest to disclose in relationship with the current  
438 work.

439

440 **Funding**

441 This research has received funding from the European Union's Horizon 2020 Framework  
442 Programme for Research and Innovation under the Specific Grant Agreement No. 720270  
443 (Human Brain Project SGA1- to M.M.), No. 785907 (Human Brain Project SGA2 - to M.M.  
444 and P.A.), and No. 945539 (Human Brain Project SGA3 - to M.M. and P.A.). The study has  
445 also been partially funded by the grant "Sinergia" CRSII3\_160803/1 of the Swiss National  
446 Science Foundation (to M.M.) and the Tiny Blue Dot Foundation (to M.M.).

447

448 **Acknowledgements**

449 We are grateful to Mario Rosanova, Susanna Bianchi, Jacopo Favaro, Michela Solbiati,  
450 Aurora Sium, Alessandro Viganò, Renzo Comolatti, Giulia Furregoni and Martina Revay  
451 for their comments and suggestions.

452 **Figures**  
453

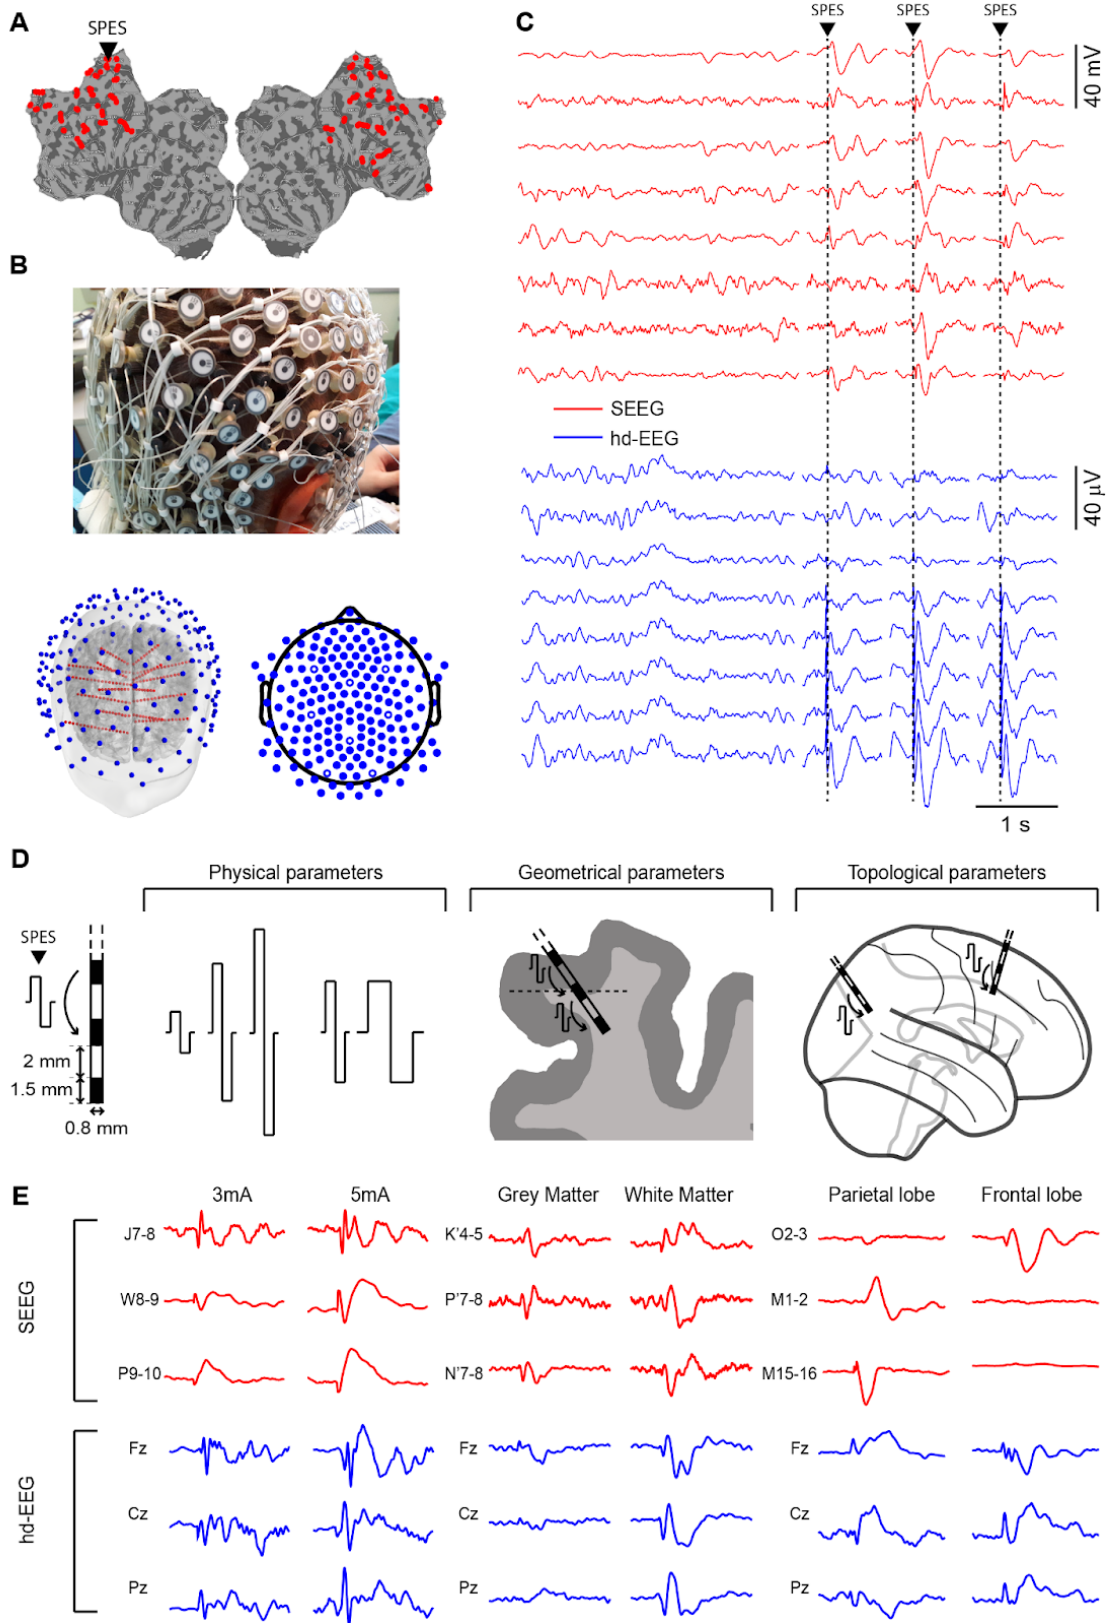

454  
455

456 **Figure 1. Experimental setup. Panel A.** Topographical representation, on a flatmap, of  
457 the SEEG contacts in one representative subject. The black triangle indicates the contact  
458 used for SPES (anterior cingulate). **Panel B.** Picture of simultaneous SEEG and hd-EEG  
459 recordings, 3D reconstruction of the brain and SEEG implant of one representative patient  
460 (same as A) and topographical representation of hd-EEG contacts. **Panel C.** Concurrent  
461 raw intracerebral SEEG (red) and hd-EEG (blue) signals recorded respectively from eight  
462 representative bipolar contacts and from eight scalp EEG contacts. The black triangle and  
463 dashed vertical line indicate the time at which SPES was delivered. **Panel D.** Left, outline  
464 of a multi-lead intracerebral electrode. Right, overview of stimulation parameters  
465 categories: physical, geometrical and topological. **Panel E.** Examples of intracerebral  
466 SEEG (red) and hd-EEG (blue) signals recorded from representative bipolar contacts  
467 when delivering SPES with different physical (3mA vs 5mA), geometrical (white matter vs  
468 grey matter) and topological (parietal vs frontal lobe) parameters.



469

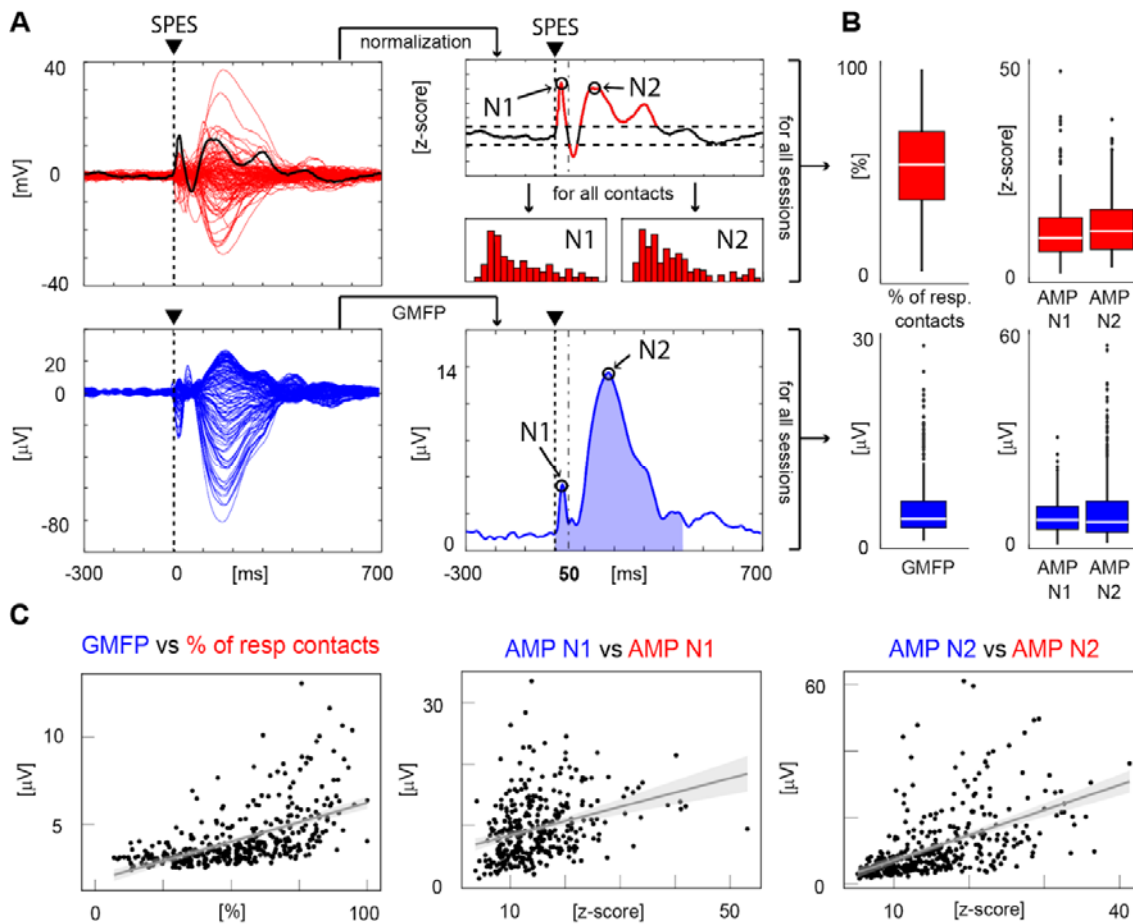

470

471

472

473

474

475

476

477

478

479

480

481

482

483

484

485

486

**Figure 2: Quantification procedures and comparisons of hd-EEG and SEEG responses to SPES.** **Panel A.** Butterfly plots, N1 and N2 detections, GMFP calculations and quantifications of SEEG (top panel, traces in red) and hd-EEG (bottom panel, traces in blue) responses to SPES. *SEEG*: the same procedure was performed for each significant SEEG bipolar contact (i.e. CCEP>6 STD of the baseline, as in [26]). After normalization (z-score) for the baseline (from -300ms to -50ms) and components detection (as in [35]), the amplitude of N1 and N2 components (black circles) were measured, obtaining two distributions (for N1 and N2). Values were then averaged across contacts to obtain average N1 and N2 amplitude values. *hd-EEG*: the GMFP is calculated from all hd-EEG contacts and then averaged between 0ms and 500ms (shaded blue area). The amplitude of N1 and N2 is detected as the maximum peak of the GMFP (black circles), respectively in the 0-50ms (dash and dot vertical line) and 50ms-300ms time window. **Panel B.** In red, from left to right, percentage of responding contacts and N1 and N2 amplitudes for all sessions, recorded in SEEG. In blue, from left to right, GMFP voltage and N1 and N2 amplitudes, for all sessions, recorded in hd-EEG. **Panel C.** Linear regression analyses

487 comparing hd-EEG (on y-axes) and SEEG measures (on x-axes). From left to right, linear  
488 regression between GMFP calculated at the hd-EEG level and the number of SEEG  
489 contacts responding to SPES with a significant CCEP ( $r=0.592$ ,  $p<0.001$ ); linear  
490 regression between the amplitude of N1 component calculated both at the hd-EEG and at  
491 the SEEG level ( $r=0.313$ ,  $p<0.001$ ); linear regression between the amplitude of N2  
492 component calculated both at the hd-EEG and at the SEEG level ( $r=0.553$ ,  $p<0.001$ ).

493

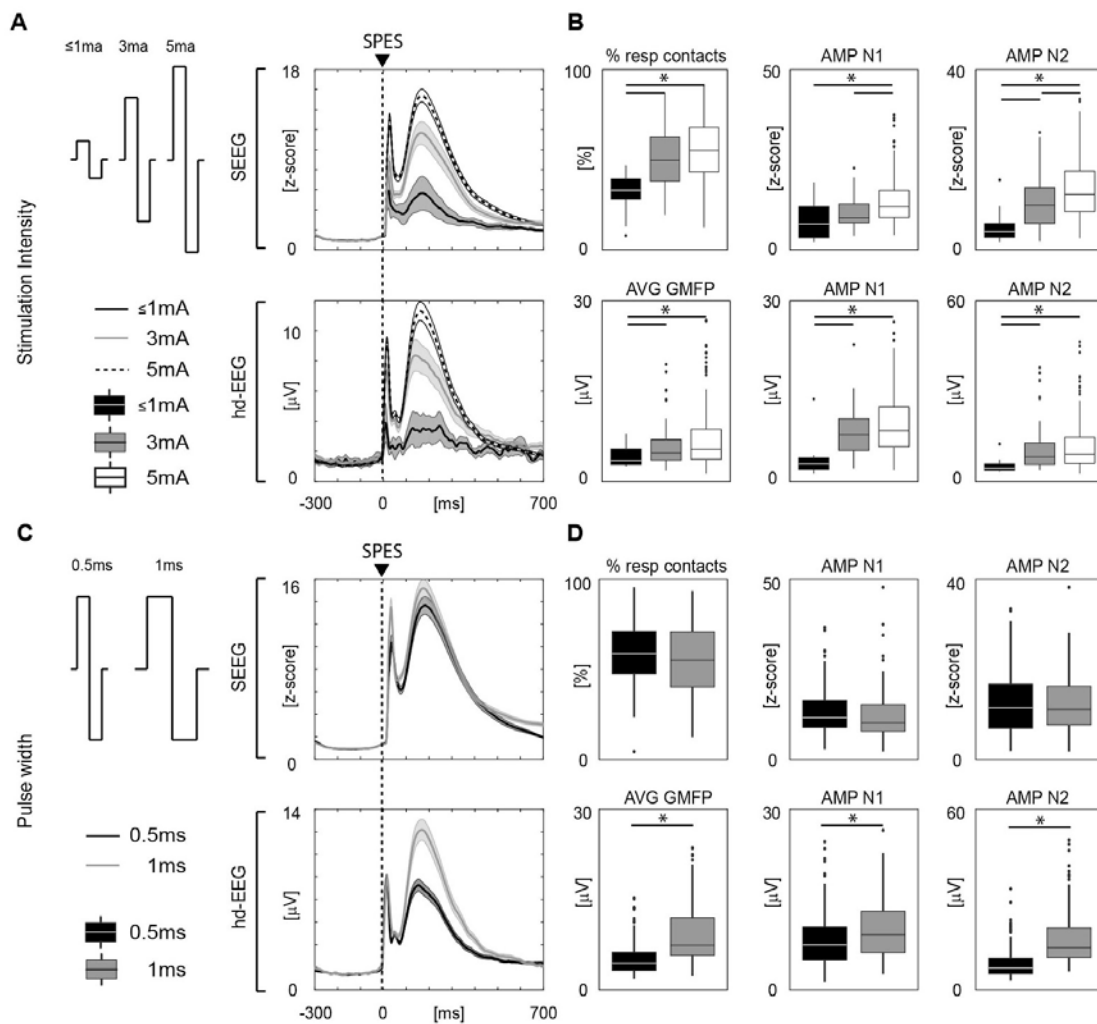

494

495

496

497

498

499

500

501

502

503

504

505

506

507

508

**Figure 3. hd-EEG and SEEG responses to SPES delivered at different physical stimulation parameters: intensities and pulse durations. Panel A.** Left, outline of the different pulse intensities; right, grand average of data obtained from all the subjects and sessions. **Panel B. Upper line:** from left to right, percentage of responding contacts and N1 and N2 amplitudes for all sessions, recorded in SEEG. **Lower line:** from left to right, GMFP voltage and N1 and N2 amplitudes, for all sessions, recorded in hd-EEG. Asterisks indicate significant statistical differences (post-hoc, two-tailed WR,  $p < 0.01$ , FDR corrected). **Panel C.** Left, outline of the different pulse durations; right, grand average of data obtained from all the subjects and sessions. **Panel D. Upper line:** from left to right, percentage of responding contacts and N1 and N2 amplitudes for all sessions, recorded in SEEG. **Lower line:** from left to right, GMFP voltage and N1 and N2 amplitudes, for all sessions, recorded in hd-EEG. Asterisks indicate significant statistical differences (WR,  $p < 0.01$ , FDR corrected).

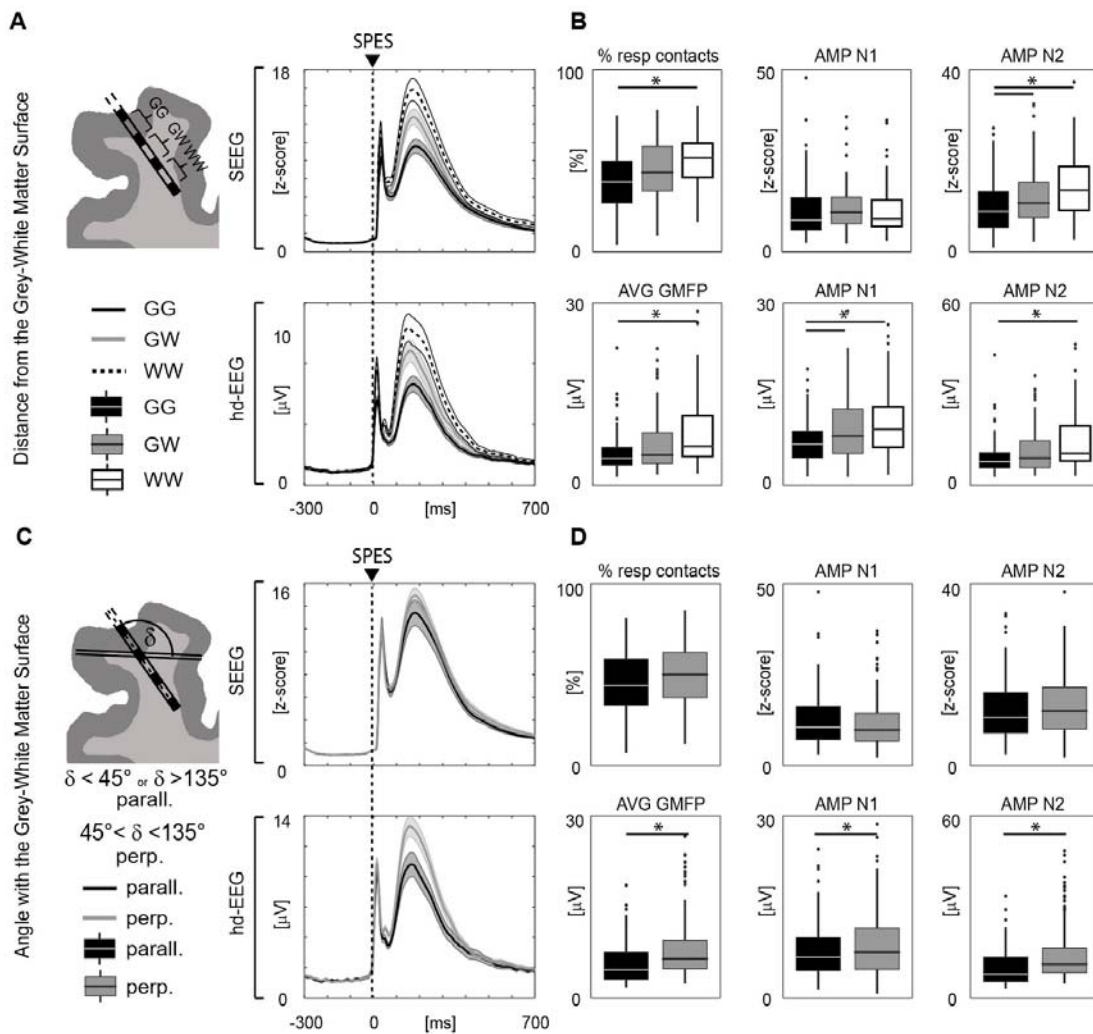

509

510

511

512

513

514

515

516

517

518

519

520

521

522

523

**Figure 4. Hd-EEG and SEEG responses to SPES delivered at different geometrical stimulation parameters. Panel A.** Left, outline of the distance from the gray-white matter surface (G and W respectively); right, grand average of data obtained from all the subjects and sessions. **Panel B.** *Upper line:* from left to right, percentage of responding contacts and N1 and N2 amplitudes for all sessions, recorded in SEEG. *Lower line:* from left to right, GMFP voltage and N1 and N2 amplitudes, for all sessions, recorded in hd-EEG. Asterisks indicate significant statistical differences (post-hoc, two-tailed WR,  $p < 0.01$ , FDR corrected). **Panel C.** Left, outline of the angle with respect to the gray-white matter surface (parallel, perpendicular); right, grand average of data obtained from all the subjects and sessions. **Panel D.** *Upper line:* from left to right, percentage of responding contacts and N1 and N2 amplitudes for all sessions, recorded in SEEG. *Lower line:* from left to right, GMFP voltage and N1 and N2 amplitudes, for all sessions, recorded in hd-EEG. Asterisks indicate significant statistical differences (WR,  $p < 0.01$ , FDR corrected).

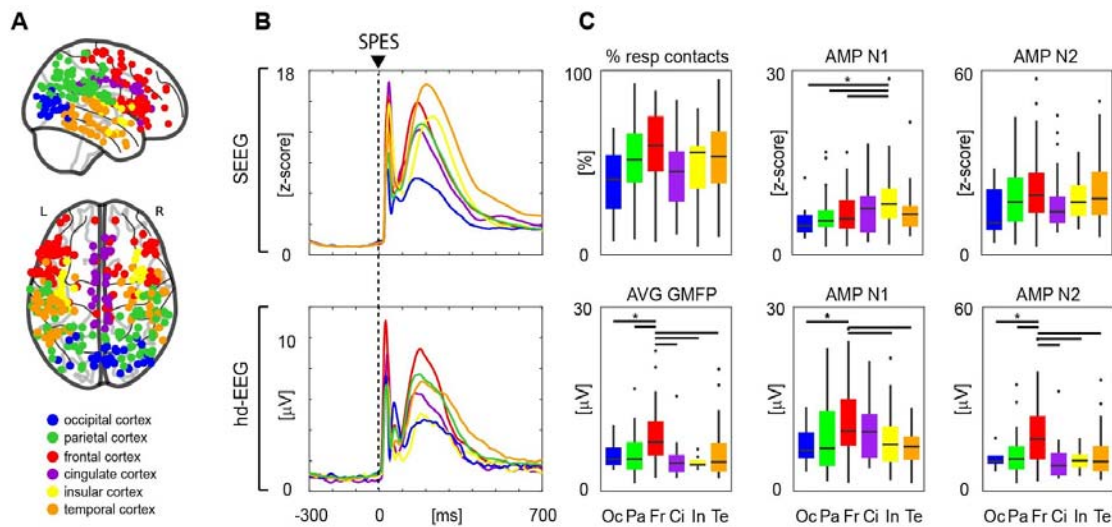

524

525

526

**Figure 5. Hd-EEG and SEEG responses to SPES delivered through contacts in**

527

**different cortical cortices (topological parameters). Panel A.** Topographical distribution

528

of the stimulations performed through bipolar SEEG contacts located in different cortical

529

areas (cingulate cortex, insula, frontal cortex, occipital cortex, parietal cortex, temporal

530

cortex). Color coding is consistent across the figure. **Panel B.** Grand average across

531

sessions and subjects of the GMFP obtained by SPES of all the six cortices reported in

532

Panel A; dashed vertical line indicates SPES timing. Here and across the figure, top

533

panels refer to SEEG recordings, while bottom panels refer to hd-EEG recordings. **Panels**

534

**C.** From left to right, boxplots of Average GMFP, amplitude of N1 and amplitude of N2.

535

Asterisks indicate significant statistical differences obtained with a post-hoc, two-tailed WR

536

test ( $p < 0.05$ , FDR corrected).

537

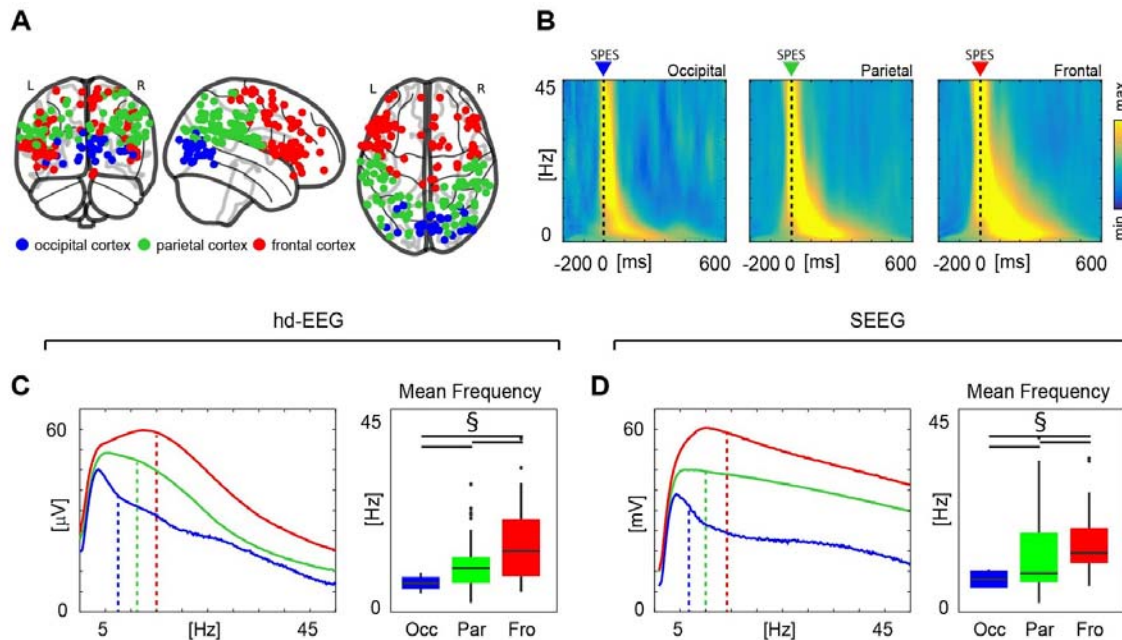

538

539

540

541

542

543

544

545

546

547

548

549

550

551

552

**Figure 6. Reproducing TMS-EEG experiments: rostro-caudal gradient of cortical spectral features.** **Panel A.** Topographical distribution of the stimulations performed through bipolar SEEG contacts located in different cortices (occipital cortex, parietal cortex, frontal cortex). Color coding is consistent across the figure. **Panel B.** The spectral properties (ERSP) emerged at the whole brain level after SPES in the three different sites (occipital, parietal, frontal), recorded with hd-EEG. **Panel C** concerns hd-EEG recordings. *Left.* Grand average across sessions and subjects of spectral profile, namely ERSPs cumulated over time (between 5ms and 150ms), obtained by SPES of occipital, parietal and frontal cortices; dashed vertical lines indicate mean frequencies. *Right.* Boxplot of the mean frequency for occipital, parietal, and frontal cortices. § indicates significant statistical differences ( $p < 0.05$ ) obtained with one-tailed Wilcoxon test, under the assumption that the mean frequency of occipital, parietal and frontal cortex are characterized by a rostro-caudal gradient [22]. **Panel D.** Same as C but concerning SEEG recordings.

## 553 Bibliography

554

- 555 [1] Foerster O, Altenburger H. Elektrobiologische Vorgänge an der menschlichen Hirnrinde.  
556 Deutsche Zeitschrift Für Nervenheilkunde 1935;135:277–88.
- 557 [2] Krause F. Die operative behandlung der epilepsie. Medizinische Klinik 1909;5:1418–22.
- 558 [3] Yamao Y, Matsumoto R, Kunieda T, Arakawa Y, Kobayashi K, Usami K, et al.  
559 Intraoperative dorsal language network mapping by using single-pulse electrical stimulation:  
560 Intraoperative Language Network Mapping. Hum Brain Mapp 2014;35:4345–61.  
561 <https://doi.org/10.1002/hbm.22479>.
- 562 [4] David O, Bastin J, Chabardès S, Minotti L, Kahane P. Studying Network Mechanisms Using  
563 Intracranial Stimulation in Epileptic Patients. Front Syst Neurosci 2010;4.  
564 <https://doi.org/10.3389/fnsys.2010.00148>.
- 565 [5] Selimbeyoglu A, Parvizi J. Electrical stimulation of the human brain: perceptual and  
566 behavioral phenomena reported in the old and new literature. Frontiers in Human  
567 Neuroscience 2010;4:46.
- 568 [6] Fox KC, Foster BL, Kucyi A, Daitch AL, Parvizi J. Intracranial electrophysiology of the  
569 human default network. Trends in Cognitive Sciences 2018;22:307–24.
- 570 [7] Cossu M, Cardinale F, Castana L, Citterio A, Francione S, Tassi L, et al.  
571 Stereoelectroencephalography in the Presurgical Evaluation of Focal Epilepsy: A  
572 Retrospective Analysis of 215 Procedures. Neurosurgery 2005;57:706–18.  
573 <https://doi.org/10.1227/01.NEU.0000176656.33523.1e>.
- 574 [8] Cardinale F, Rizzi M, Vignati E, Cossu M, Castana L, d’Orio P, et al.  
575 Stereoelectroencephalography: retrospective analysis of 742 procedures in a single centre.  
576 Brain 2019;142:2688–704. <https://doi.org/10.1093/brain/awz196>.
- 577 [9] Valentin A. Responses to single pulse electrical stimulation identify epileptogenesis in the  
578 human brain in vivo. Brain 2002;125:1709–18. <https://doi.org/10.1093/brain/awf187>.
- 579 [10] Parvizi J, Kastner S. Promises and limitations of human intracranial  
580 electroencephalography. Nat Neurosci 2018;21:474–83. <https://doi.org/10.1038/s41593-018-0108-2>.
- 581
- 582 [11] Alarcón G, Jiménez-Jiménez D, Valentín A, Martín-López D. Characterizing EEG Cortical  
583 Dynamics and Connectivity with Responses to Single Pulse Electrical Stimulation (SPES).  
584 Int J Neur Syst 2018;28:1750057. <https://doi.org/10.1142/S0129065717500575>.
- 585 [12] Valentín A, Alarcón G, Honavar M, García Seoane JJ, Selway RP, Polkey CE, et al. Single  
586 pulse electrical stimulation for identification of structural abnormalities and prediction of  
587 seizure outcome after epilepsy surgery: a prospective study. The Lancet Neurology  
588 2005;4:718–26. [https://doi.org/10.1016/S1474-4422\(05\)70200-3](https://doi.org/10.1016/S1474-4422(05)70200-3).

- 589 [13]Keller CJ, Bickel S, Entz L, Ulbert I, Milham MP, Kelly C, et al. Intrinsic functional  
590 architecture predicts electrically evoked responses in the human brain. *Proceedings of the*  
591 *National Academy of Sciences* 2011;108:10308–13.  
592 <https://doi.org/10.1073/pnas.1019750108>.
- 593 [14] Matsumoto R, Kunieda T, Nair D. Single pulse electrical stimulation to probe functional and  
594 pathological connectivity in epilepsy. *Seizure* 2017;44:27–36.
- 595 [15]Schalk G, Kubanek J, Miller KJ, Anderson NR, Leuthardt EC, Ojemann JG, et al. Decoding  
596 two-dimensional movement trajectories using electrocorticographic signals in humans.  
597 *Journal of Neural Engineering* 2007;4:264.
- 598 [16]Ball T, Kern M, Mutschler I, Aertsen A, Schulze-Bonhage A. Signal quality of  
599 simultaneously recorded invasive and non-invasive EEG. *Neuroimage* 2009;46:708–16.
- 600 [17]Keller CJ, Honey CJ, Mégevand P, Entz L, Ulbert I, Mehta AD. Mapping human brain  
601 networks with cortico-cortical evoked potentials. *Phil Trans R Soc B* 2014;369:20130528.  
602 <https://doi.org/10.1098/rstb.2013.0528>.
- 603 [18]Silverstein BH, Asano E, Sugiura A, Sonoda M, Lee M-H, Jeong J-W. Dynamic  
604 tractography: Integrating cortico-cortical evoked potentials and diffusion imaging.  
605 *Neuroimage* 2020;215:116763.
- 606 [19]Scorza D, Amoroso G, Cortés C, Artetxe A, Bertelsen Á, Rizzi M, et al. Experience-based  
607 SEEG planning: from retrospective data to automated electrode trajectories suggestions.  
608 *Healthcare Technology Letters* 2018;5:167–71.
- 609 [20]Rosanova M, Casali A, Bellina V, Resta F, Mariotti M, Massimini M. Natural frequencies of  
610 human corticothalamic circuits. *Journal of Neuroscience* 2009;29:7679–85.
- 611 [21]Mikulan E, Russo S, Parmigiani S, Sarasso S, Zauli FM, Rubino A, et al. Simultaneous  
612 human intracerebral stimulation and HD-EEG, ground-truth for source localization methods.  
613 *Sci Data* 2020;7:127. <https://doi.org/10.1038/s41597-020-0467-x>.
- 614 [22]Cardinale F, Cossu M, Castana L, Casaceli G, Schiariti MP, Miserocchi A, et al.  
615 Stereoelectroencephalography: surgical methodology, safety, and stereotactic application  
616 accuracy in 500 procedures. *Neurosurgery* 2013;72:353–66.
- 617 [23]Desikan RS, Ségonne F, Fischl B, Quinn BT, Dickerson BC, Blacker D, et al. An automated  
618 labeling system for subdividing the human cerebral cortex on MRI scans into gyral based  
619 regions of interest. *Neuroimage* 2006;31:968–80.
- 620 [24]Pigorini A, Sarasso S, Proserpio P, Szymanski C, Arnulfo G, Casarotto S, et al. Bistability  
621 breaks-off deterministic responses to intracortical stimulation during non-REM sleep.  
622 *NeuroImage* 2015;112:105–13. <https://doi.org/10.1016/j.neuroimage.2015.02.056>.
- 623 [25]Rosanova M, Fecchio M, Casarotto S, Sarasso S, Casali AG, Pigorini A, et al. Sleep-like  
624 cortical OFF-periods disrupt causality and complexity in the brain of unresponsive  
625 wakefulness syndrome patients. *Nature Communications* 2018;9:1–10.



- 626 [26]Keller CJ, Honey CJ, Entz L, Bickel S, Groppe DM, Toth E, et al. Corticocortical Evoked  
627 Potentials Reveal Projectors and Integrators in Human Brain Networks. *Journal of*  
628 *Neuroscience* 2014;34:9152–63. <https://doi.org/10.1523/JNEUROSCI.4289-13.2014>.
- 629 [27]Matsumoto R, Nair DR, LaPresto E, Najm I, Bingaman W, Shibusaki H, et al. Functional  
630 connectivity in the human language system: a cortico-cortical evoked potential study. *Brain*  
631 2004;127:2316–30. <https://doi.org/10.1093/brain/awh246>.
- 632 [28]Trebault L, Deman P, Tuyisenge V, Jedynak M, Hugues E, Rudrauf D, et al. Probabilistic  
633 functional tractography of the human cortex revisited. *NeuroImage* 2018;181:414–29.  
634 <https://doi.org/10.1016/j.neuroimage.2018.07.039>.
- 635 [29]Delorme A, Makeig S. EEGLAB: an open source toolbox for analysis of single-trial EEG  
636 dynamics including independent component analysis. *Journal of Neuroscience Methods*  
637 2004;134:9–21.
- 638 [30]Dubarry A-S, Badier J-M, Trébuchon-Da Fonseca A, Gavaret M, Carron R, Bartolomei F, et  
639 al. Simultaneous recording of MEG, EEG and intracerebral EEG during visual stimulation:  
640 from feasibility to single-trial analysis. *Neuroimage* 2014;99:548–58.
- 641 [31]Badier J-M, Dubarry AS, Gavaret M, Chen S, Trébuchon AS, Marquis P, et al. Technical  
642 solutions for simultaneous MEG and SEEG recordings: towards routine clinical use.  
643 *Physiological Measurement* 2017;38:N118.
- 644 [32]Mofakham S, Fry A, Adachi J, Stefancin PL, Duong TQ, Saadon JR, et al.  
645 Electro corticography reveals thalamic control of cortical dynamics following traumatic brain  
646 injury. *Communications Biology* 2021;4:1–10.
- 647 [33] Latreille V, von Ellenrieder N, Peter-Derex L, Dubeau F, Gotman J, Frauscher B. The  
648 human K-complex: Insights from combined scalp-intracranial EEG recordings. *NeuroImage*  
649 2020;213:116748. <https://doi.org/10.1016/j.neuroimage.2020.116748>.
- 650 [34]van't Klooster MA, Zijlmans M, Leijten FS, Ferrier CH, Van Putten MJ, Huiskamp GJ. Time-  
651 frequency analysis of single pulse electrical stimulation to assist delineation of epileptogenic  
652 cortex. *Brain* 2011;134:2855–66.
- 653 [35]Trebault L, Rudrauf D, Job A-S, Măliia MD, Popa I, Barborica A, et al. Stimulation artifact  
654 correction method for estimation of early cortico-cortical evoked potentials. *Journal of*  
655 *Neuroscience Methods* 2016;264:94–102.
- 656 [36]Matsumoto R, Nair DR, LaPresto E, Bingaman W, Shibusaki H, Luders HO. Functional  
657 connectivity in human cortical motor system: a cortico-cortical evoked potential study. *Brain*  
658 2006;130:181–97. <https://doi.org/10.1093/brain/awl257>.
- 659 [37]Crocker B, Ostrowski L, Williams ZM, Dougherty DD, Eskandar EN, Widge AS, et al. Local  
660 and distant responses to single pulse electrical stimulation reflect different forms of  
661 connectivity. *NeuroImage* 2021;237:118094.  
662 <https://doi.org/10.1016/j.neuroimage.2021.118094>.

- 663 [38]Mohan UR, Watrous AJ, Miller JF, Lega BC, Sperling MR, Worrell GA, et al. The effects of  
664 direct brain stimulation in humans depend on frequency, amplitude, and white-matter  
665 proximity. *Brain Stimulation* 2020;13:1183–95. <https://doi.org/10.1016/j.brs.2020.05.009>.
- 666 [39]Donos C, Mîndruță I, Ciurea J, Măliia MD, Barborica A. A comparative study of the effects  
667 of pulse parameters for intracranial direct electrical stimulation in epilepsy. *Clinical*  
668 *Neurophysiology* 2016;127:91–101. <https://doi.org/10.1016/j.clinph.2015.02.013>.
- 669 [40]Brocker DT, Grill WM. Principles of electrical stimulation of neural tissue. *Handbook of*  
670 *Clinical Neurology* 2013;116:3–18.
- 671 [41]Kunieda T, Yamao Y, Kikuchi T, Matsumoto R. New approach for exploring cerebral  
672 functional connectivity: review of cortico-cortical evoked potential. *Neurologia Medico-*  
673 *Chirurgica* 2015;55:374–82.
- 674 [42]Usami K, Matsumoto R, Kobayashi K, Hitomi T, Shimotake A, Kikuchi T, et al. Sleep  
675 modulates cortical connectivity and excitability in humans: Direct evidence from neural  
676 activity induced by single-pulse electrical stimulation. *Human Brain Mapping* 2015;36:4714–  
677 29.
- 678 [43]Lujan JL, Chaturvedi A, Choi KS, Holtzheimer PE, Gross RE, Mayberg HS, et al.  
679 Tractography-activation models applied to subcallosal cingulate deep brain stimulation.  
680 *Brain Stimulation* 2013;6:737–9.
- 681 [44]Riva-Posse P, Choi KS, Holtzheimer PE, McIntyre CC, Gross RE, Chaturvedi A, et al.  
682 Defining critical white matter pathways mediating successful subcallosal cingulate deep  
683 brain stimulation for treatment-resistant depression. *Biological Psychiatry* 2014;76:963–9.
- 684 [45]Basu I, Robertson MM, Crocker B, Peled N, Farnes K, Vallejo-Lopez DI, et al. Consistent  
685 linear and non-linear responses to invasive electrical brain stimulation across individuals  
686 and primate species with implanted electrodes. *Brain Stimulation* 2019;12:877–92.  
687 <https://doi.org/10.1016/j.brs.2019.03.007>.
- 688 [46]McIntyre CC, Savasta M, Walter BL, Vitek JL. How does deep brain stimulation work?  
689 Present understanding and future questions. *Journal of Clinical Neurophysiology*  
690 2004;21:40–50.
- 691 [47]Slopesma JP, Peña E, Patriat R, Lehto LJ, Gröhn O, Mangia S, et al. Clinical deep brain  
692 stimulation strategies for orientation-selective pathway activation. *J Neural Eng*  
693 2018;15:056029. <https://doi.org/10.1088/1741-2552/aad978>.
- 694 [48]Stiso J, Khambhati AN, Menara T, Kahn AE, Stein JM, Das SR, et al. White Matter Network  
695 Architecture Guides Direct Electrical Stimulation through Optimal State Transitions. *Cell*  
696 *Rep* 2019;28:2554-2566.e7. <https://doi.org/10.1016/j.celrep.2019.08.008>.
- 697 [49]Mercier MR, Bickel S, Megevand P, Groppe DM, Schroeder CE, Mehta AD, et al.  
698 Evaluation of cortical local field potential diffusion in stereotactic electro-encephalography  
699 recordings: A glimpse on white matter signal. *NeuroImage* 2017;147:219–32.

- 700 [50]Slopsema JP, Peña E, Patriat R, Lehto LJ, Gröhn O, Mangia S, et al. Clinical deep brain  
701 stimulation strategies for orientation-selective pathway activation. *J Neural Eng* 2018;15.  
702 <https://doi.org/10.1088/1741-2552/aad978>.
- 703 [51]Reveley, C., Seth, A. K., Pierpaoli, C., Silva, A. C., Yu, D., Saunders, R. C., ... & Frank, Q.  
704 Y. (2015). Superficial white matter fiber systems impede detection of long-range cortical  
705 connections in diffusion MR tractography. *Proceedings of the National Academy of*  
706 *Sciences*, 112(21), E2820-E2828.
- 707 [52]Iannetti GD, Hughes NP, Lee MC, Mouraux A. Determinants of laser-evoked EEG  
708 responses: pain perception or stimulus saliency? *Journal of Neurophysiology*  
709 2008;100:815–28.
- 710 [53]Novembre G, Pawar VM, Bufacchi RJ, Kilintari M, Srinivasan M, Rothwell JC, et al.  
711 Saliency detection as a reactive process: unexpected sensory events evoke  
712 corticomuscular coupling. *Journal of Neuroscience* 2018;38:2385–97.
- 713 [54]Voysey Z, Martín-López D, Jiménez-Jiménez D, Selway RP, Alarcón G, Valentín A.  
714 Electrical stimulation of the anterior cingulate gyrus induces responses similar to K-  
715 complexes in awake humans. *Brain Stimulation* 2015;8:881–90.
- 716 [55]Somervail R, Zhang F, Novembre G, Bufacchi RJ, Guo Y, Crepaldi M, et al. Waves of  
717 Change: Brain Sensitivity to Differential, not Absolute, Stimulus Intensity is Conserved  
718 Across Humans and Rats. *Cerebral Cortex* 2021;31:949–60.
- 719 [56]Fecchio M, Pigorini A, Comanducci A, Sarasso S, Casarotto S, Premoli I, et al. The spectral  
720 features of EEG responses to transcranial magnetic stimulation of the primary motor cortex  
721 depend on the amplitude of the motor evoked potentials. *PloS One* 2017;12:e0184910.
- 722 [57]Casarotto S, Romero Lauro LJ, Bellina V, Casali AG, Rosanova M, Pigorini A, et al. EEG  
723 responses to TMS are sensitive to changes in the perturbation parameters and repeatable  
724 over time. *PloS One* 2010;5:e10281.
- 725 [58]Ilmoniemi RJ, Kičić D. Methodology for combined TMS and EEG. *Brain Topography*  
726 2010;22:233–48.
- 727 [59]Nathan SS, Sinha SR, Gordon B, Lesser RP, Thakor NV. Determination of current density  
728 distributions generated by electrical stimulation of the human cerebral cortex.  
729 *Electroencephalography and Clinical Neurophysiology* 1993;86:183–92.
- 730 [60]Belardinelli P, Biabani M, Blumberger DM, Bortoletto M, Casarotto S, David O, et al.  
731 Reproducibility in TMS–EEG studies: A call for data sharing, standard procedures and  
732 effective experimental control. *Brain Stimulation: Basic, Translational, and Clinical*  
733 *Research in Neuromodulation* 2019;12:787–90.
- 734 [61]Kundu B, Davis TS, Philip B, Smith EH, Arain A, Peters A, et al. A systematic exploration of  
735 parameters affecting evoked intracranial potentials in patients with epilepsy. *Brain*  
736 *Stimulation* 2020;13:1232–44. <https://doi.org/10.1016/j.brs.2020.06.002>.

- 737 [62] Darmani, G., Bergmann, T. O., Zipser, C., Baur, D., Müller-Dahlhaus, F., & Ziemann, U.  
738 Effects of antiepileptic drugs on cortical excitability in humans: a TMS-EMG and TMS-EEG  
739 study. *Human brain mapping*, 2019, 40(4), 1276-1289.
- 740 [63] Paulk AC, Zelman R, Crocker B, Widge AS, Dougherty DD, Eskandar EN, et al. Impact of  
741 stimulation location relative to grey and white matter on single pulse electrical stimulation  
742 responses in the human brain. *BioRxiv* 2021:2021.10.07.463524.  
743 <https://doi.org/10.1101/2021.10.07.463524>.
- 744 [64] Sporns O, Honey CJ. Small worlds inside big brains. *Proc Natl Acad Sci U S A* . 2006 Dec  
745 19;103(51):19219-20.
- 746 [65] Deco G, Jirsa VK, McIntosh AR. Emerging concepts for the dynamical organization of  
747 resting-state activity in the brain. *Nature Reviews Neuroscience* 2011;12:43–56.

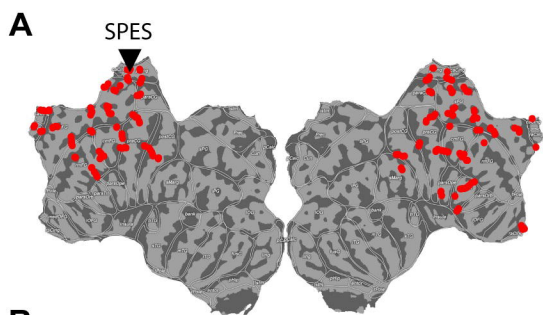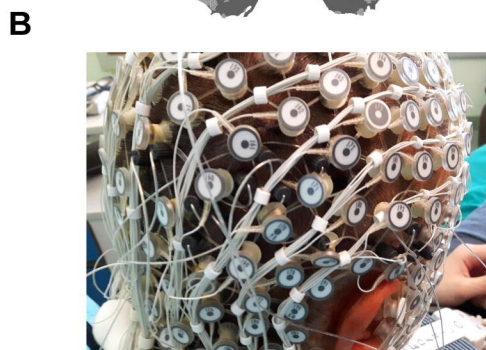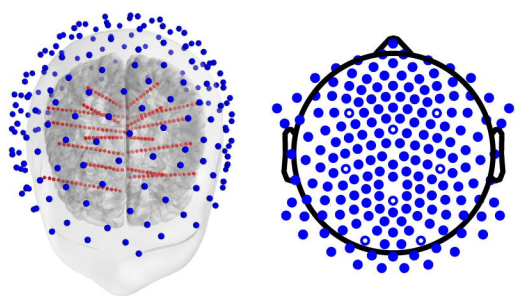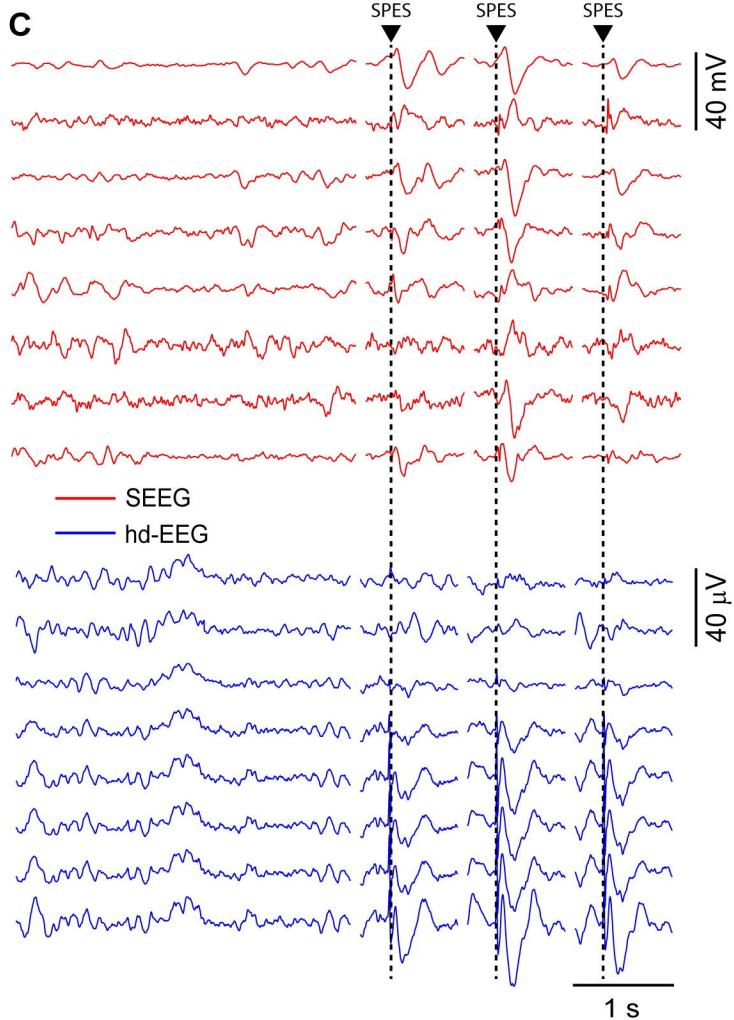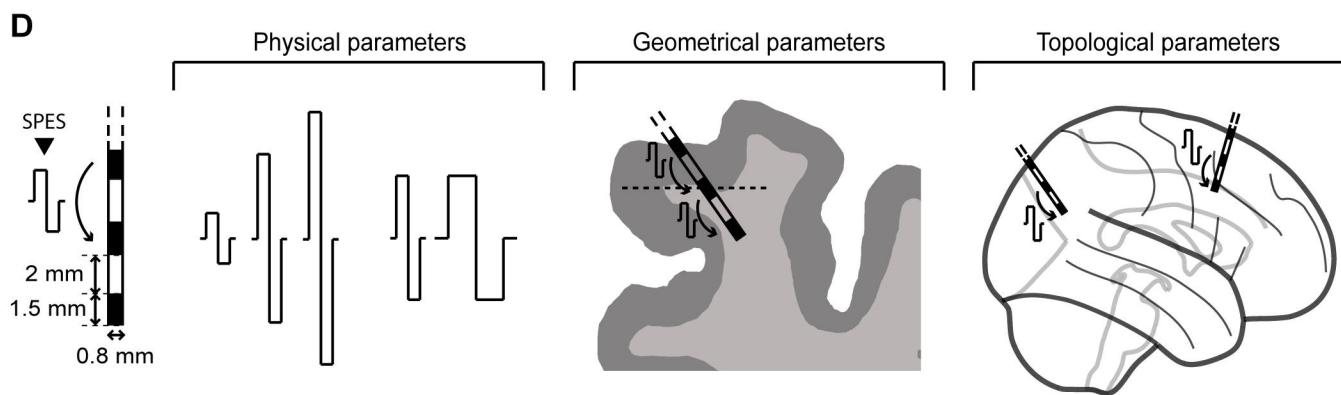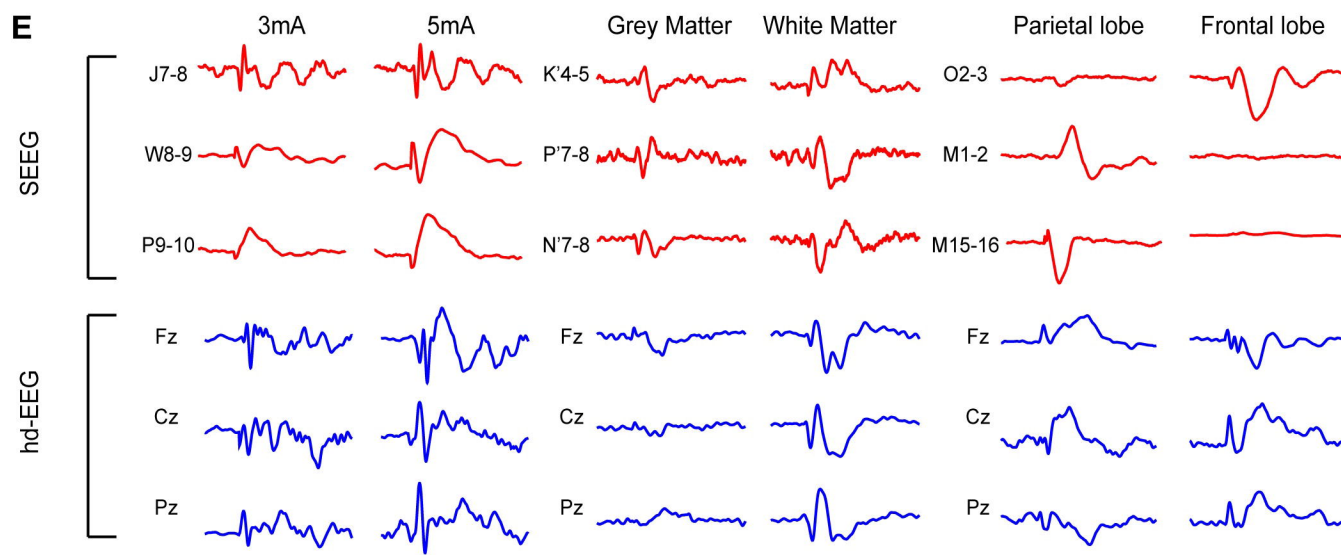

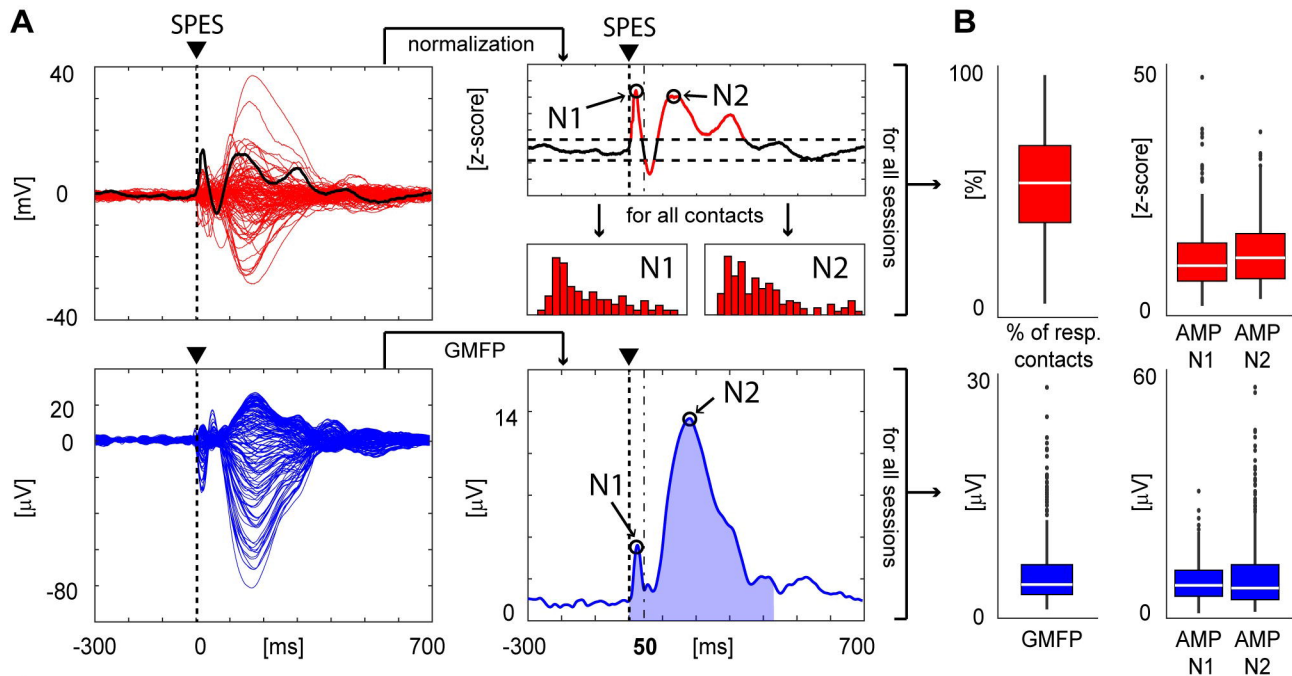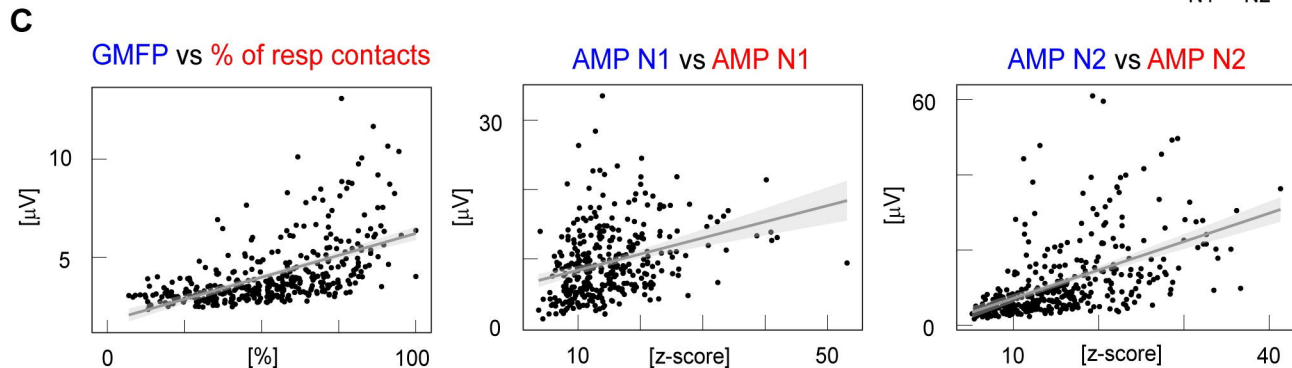

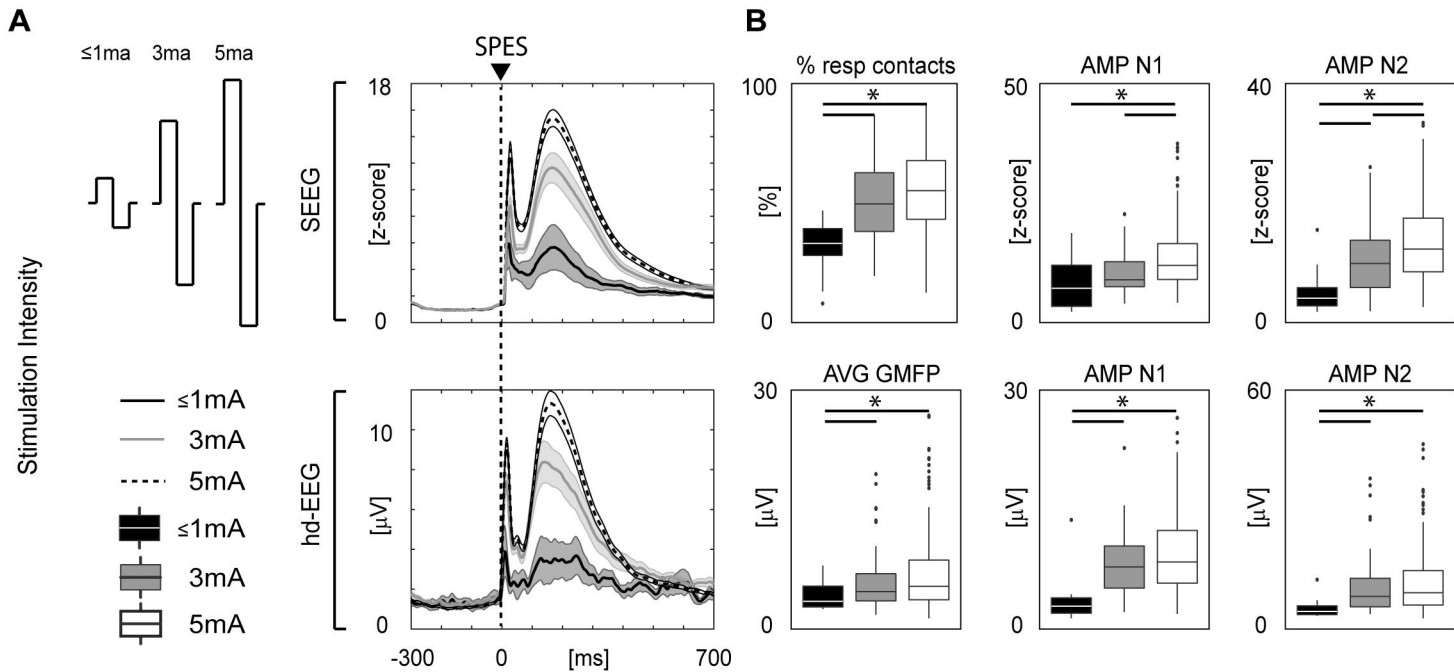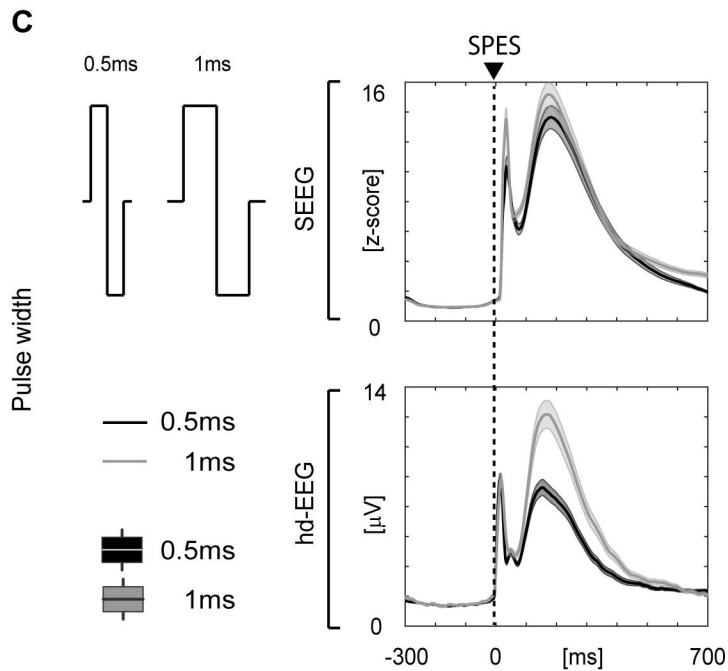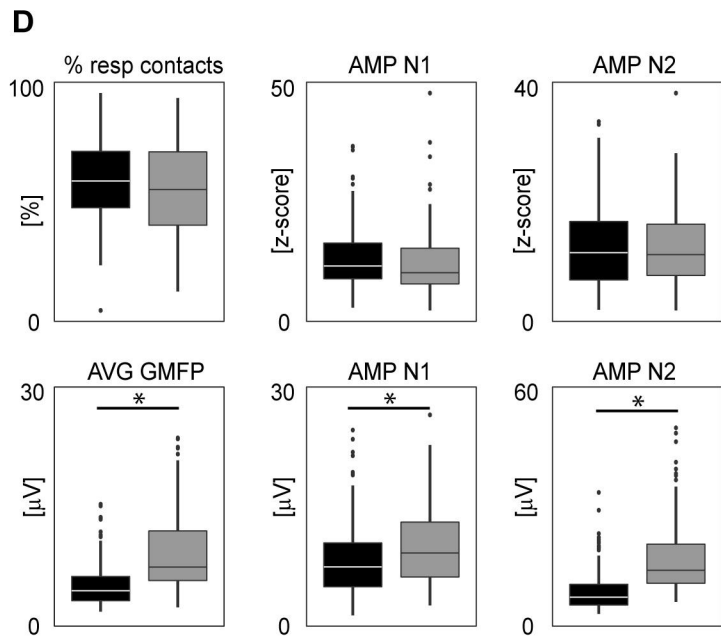

Distance from the Grey-White Matter Surface

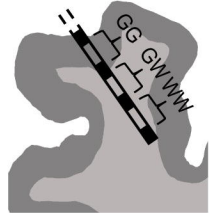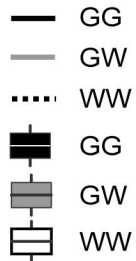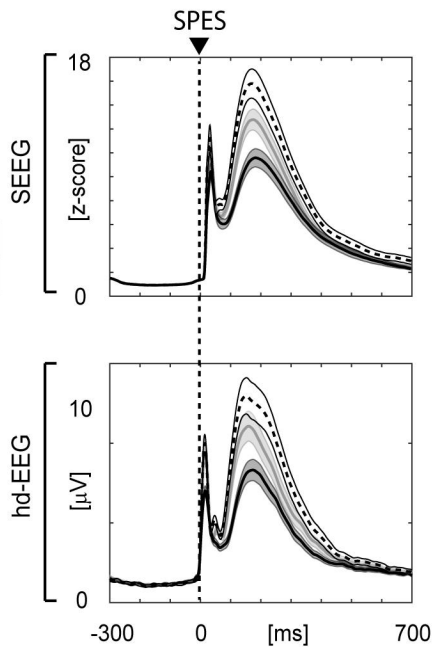

**B**

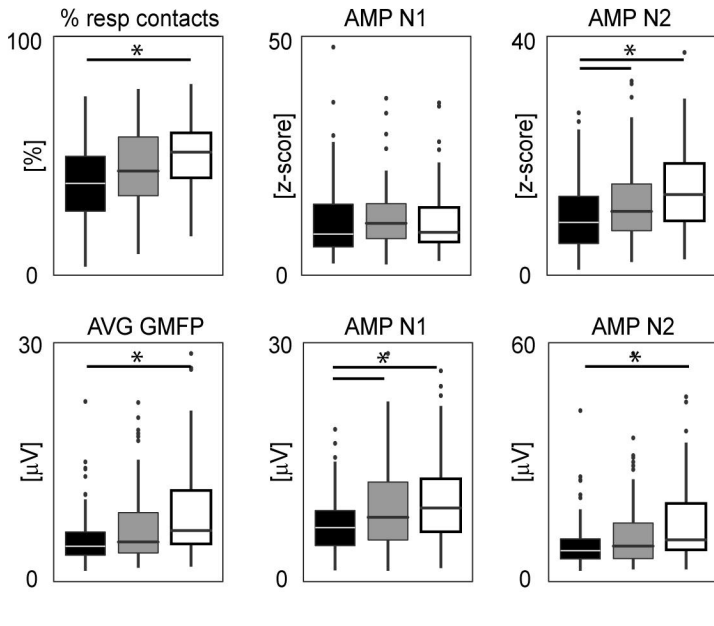

**C**

Angle with the Grey-White Matter Surface

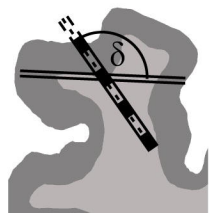

$\delta < 45^\circ$  or  $\delta > 135^\circ$   
parall.

$45^\circ < \delta < 135^\circ$   
perp.

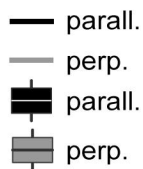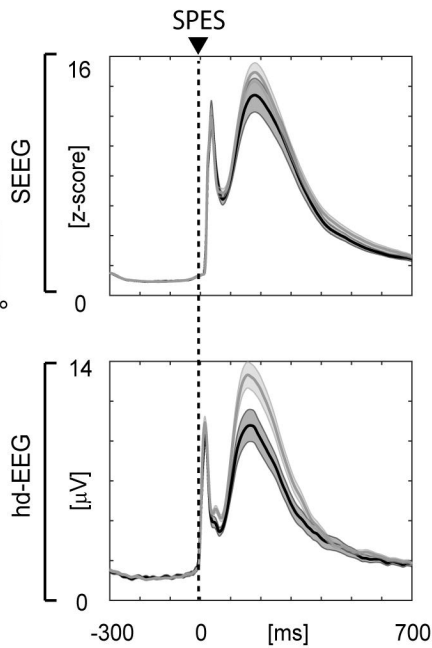

**D**

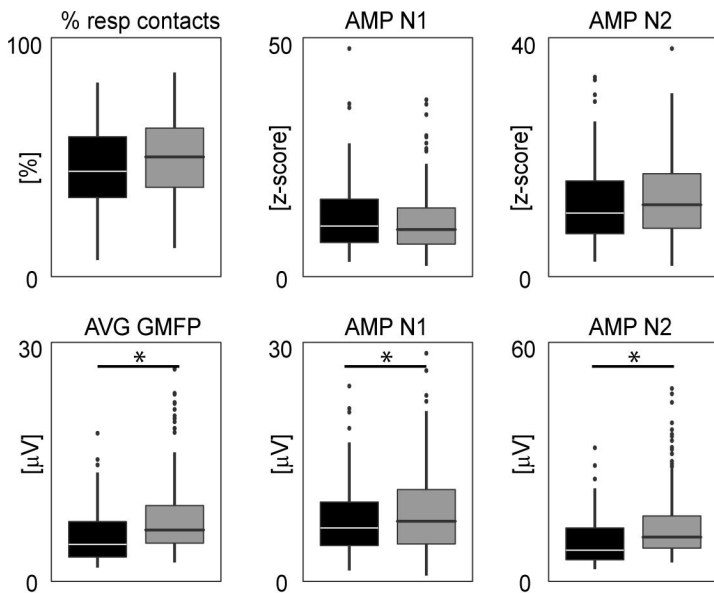



**A**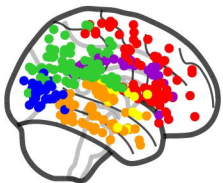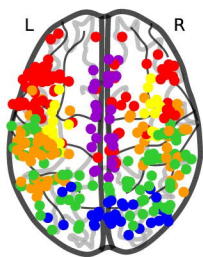

- occipital cortex
- parietal cortex
- frontal cortex
- cingulate cortex
- insular cortex
- temporal cortex

**B**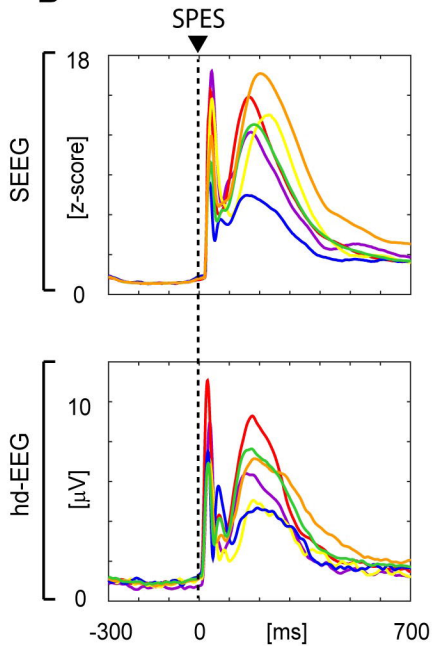**C**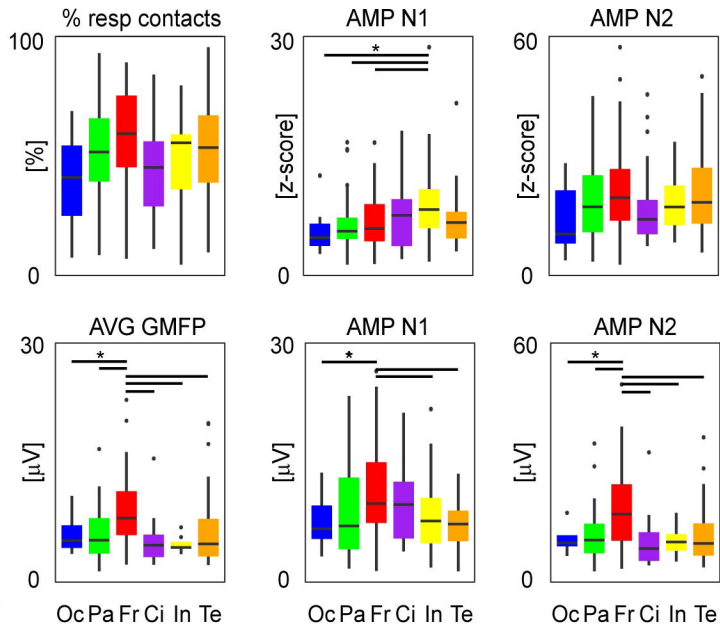

**A**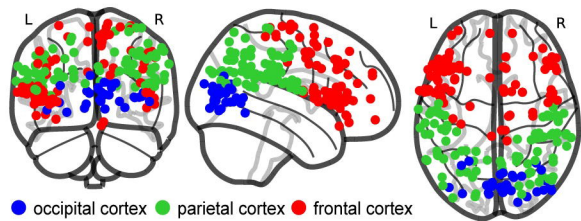

hd-EEG

**B**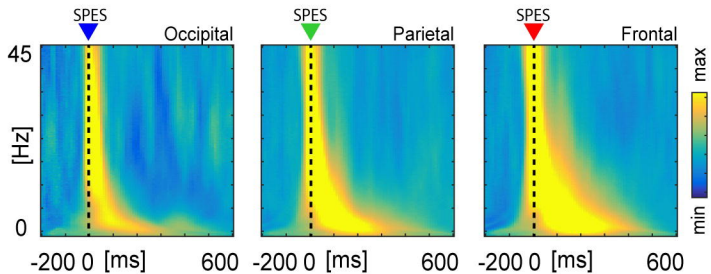

SEEG

**C**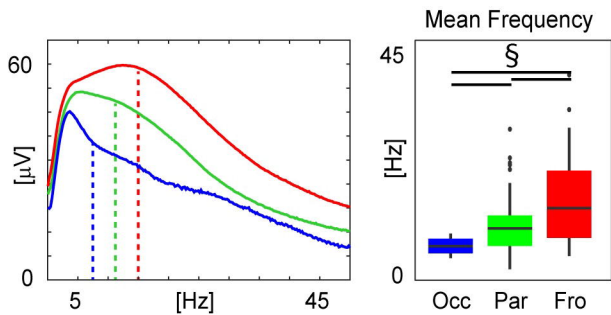**D**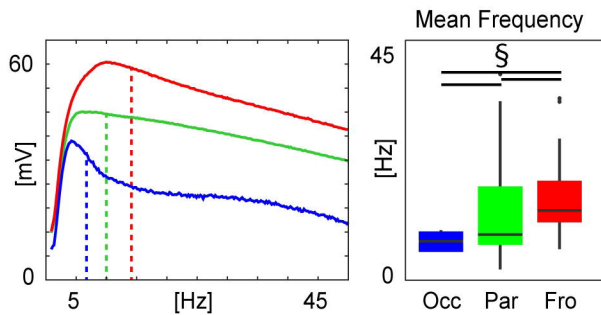

Source: https://www.biorxiv.org/content/10.1101/2021.11.15.468625v1.full.pdf
